1 **Genome-wide scan and fine-mapping of rare nonsynonymous associations implicates**  
2 **intracellular lipolysis genes in fat distribution and cardio-metabolic risk**

3  
4 Luca A. Lotta<sup>a</sup>, Liang Dong<sup>b</sup>, Chen Li<sup>a</sup>, Satish Patel<sup>b</sup>, Isobel D. Stewart<sup>a</sup>, Koini Lim<sup>b</sup>, Felix R. Day<sup>a</sup>,  
5 Eleanor Wheeler<sup>a</sup>, Craig A. Glastonbury<sup>c,d</sup>, Marcel Van de Streek<sup>c</sup>, Stephen J. Sharp<sup>a</sup>, Jian'an Luan<sup>a</sup>,  
6 Nicholas Bowker<sup>a</sup>, Martina Schweiger<sup>e</sup>, Laura B. L. Wittemans<sup>a</sup>, Nicola D. Kerrison<sup>a</sup>, Lina Cai<sup>a</sup>, Debora  
7 M. E. Lucarelli<sup>a</sup>, Inês Barroso<sup>f</sup>, Mark I. McCarthy<sup>g,h,i</sup>, Robert A. Scott<sup>a</sup>, Rudolf Zechner<sup>c</sup>, John R. B.  
8 Perry<sup>a</sup>, Vladimir Saudek<sup>b</sup>, Kerrin S. Small<sup>c</sup>, Stephen O'Rahilly<sup>b1</sup>, Nicholas J. Wareham<sup>a1</sup>, David B.  
9 Savage<sup>b1</sup>, Claudia Langenberg<sup>a1</sup>.

10  
11  
12 a MRC Epidemiology Unit, University of Cambridge School of Clinical Medicine, Box 285 Institute of  
13 Metabolic Science, Cambridge Biomedical Campus, Cambridge, United Kingdom, CB2 0QQ

14 b University of Cambridge Metabolic Research Laboratories, Wellcome Trust-MRC Institute of Metabolic  
15 Science, Box 289, Cambridge Biomedical Campus, Cambridge, United Kingdom, CB2 0QQ

16 c Department of Twin Research and Genetic Epidemiology, King's College London, St Thomas' Campus,  
17 Lambeth Palace Road, London, SE1 7EH, United Kingdom

18 d Big Data Institute, Li Ka Shing Centre for Health Information and Discovery, University of Oxford, Old  
19 Road Campus, Oxford, OX3 7LF, United Kingdom

20 e Institute of Molecular Biosciences, University of Graz, 8010 Graz, Austria

21 f Wellcome Sanger Institute, Hinxton, Cambridge, CB10 1SA, United Kingdom

22 g Oxford Centre for Diabetes, Endocrinology and Metabolism, Churchill Hospital, University of Oxford,  
23 Headington, Oxford, OX3 7LE, United Kingdom

24 h Wellcome Centre for Human Genetics, University of Oxford, Roosevelt Drive, Oxford, OX3 7BN  
25 United Kingdom

26 i Oxford NIHR Biomedical Research Centre, Oxford University Hospitals Trust, Headley Way,  
27 Headington, Oxford, OX3 9DU, United Kingdom

28 1 these authors contributed equally  
29

30  
31 Correspondence to:

32 Claudia Langenberg ([claudia.langenberg@mrc-epid.cam.ac.uk](mailto:claudia.langenberg@mrc-epid.cam.ac.uk), +44 (0) 1223 330315)

33 David B. Savage ([dbs23@medschl.cam.ac.uk](mailto:dbs23@medschl.cam.ac.uk), +44 (0) 1223 767923)

34 Nicholas J. Wareham ([nick.wareham@mrc-epid.cam.ac.uk](mailto:nick.wareham@mrc-epid.cam.ac.uk), +44 (0) 1223 330315)

35 Stephen O'Rahilly ([so104@medschl.cam.ac.uk](mailto:so104@medschl.cam.ac.uk), +44 (0) 1223 336855)

36 Luca A. Lotta ([luca.lotta@mrc-epid.cam.ac.uk](mailto:luca.lotta@mrc-epid.cam.ac.uk), +44 (0) 1223 330315)  
37  
38

39 **Abstract**

40  
41 Difficulties in identifying causal variants and genes underlying genetic associations have  
42 limited the translational potential of genetic studies of body fat distribution, an important, partly-  
43 heritable risk factor for cardio-metabolic disease. Rare variant associations facilitate fine-  
44 mapping of causal alleles, but their contribution to fat distribution is understudied. We performed  
45 a genome-wide scan of rare nonsynonymous variants for body mass index-adjusted waist-to-hip-  
46 ratio (BMI-adjusted WHR; a widely-used measure of fat distribution) in 450,562 European  
47 ancestry individuals, followed by systematic Bayesian fine-mapping at six genome-wide  
48 ( $p < 5 \times 10^{-08}$ ; main-analysis) and two subthreshold signals (significant at a Bonferroni-corrected  
49  $p < 1.3 \times 10^{-06}$ ). We found strong statistical evidence of causal association for nonsynonymous  
50 alleles in *CALCRL* (p.L87P,  $p_{\text{conditional}} = 5.9 \times 10^{-12}$ ; posterior-probability of association  
51 [PPA]=52%), *PLIN1* (p.L90P,  $p_{\text{conditional}} = 5.5 \times 10^{-13}$ ; PPA>99%), *PDE3B* (p.R783X,  
52  $p_{\text{conditional}} = 6.2 \times 10^{-15}$ ; PPA>99%), *ACVR1C* (p.I195T;  $p_{\text{conditional}} = 5.4 \times 10^{-12}$ ; PPA>99%), and *FGF1*  
53 (p.G21E,  $p_{\text{conditional}} = 1.6 \times 10^{-07}$ ; PPA=98%). Alleles at the four likely-causal main-analysis genes  
54 affected fat distribution primarily via larger hip- rather than smaller waist-circumference and six  
55 of nine conditionally-independent WHR-lowering index-variants were associated with protection  
56 from cardiovascular or metabolic disease. All four genes are expressed in adipose tissue and have  
57 been linked with the regulation of intracellular lipolysis, which controls fat retention in mature  
58 cells. Targeted follow-up analyses of key intracellular-lipolysis genes revealed associations for a  
59 variant in the initiator of intracellular lipolysis *PNPLA2* (p.N252K) with higher BMI-adjusted-  
60 WHR and higher cardio-metabolic risk. This study provides human genetic evidence of a link  
61 between intracellular lipolysis, fat-distribution and its cardio-metabolic complications in the  
62 general population.

## 63 **Introduction**

64       Body fat distribution is a major risk factor for cardiovascular and metabolic disease  
65 independent of obesity (1-5), but the mechanistic foundations of this link are poorly understood.  
66 Several common variants associated with fat distribution (6) or with compartmental fat  
67 deposition (7, 8) are located in regulatory regions near genes that are highly expressed in adipose  
68 tissue. While consistent with a biologically plausible role of adipocyte function in fat distribution,  
69 the translational potential of these observations is limited by challenges in inferring causal genes  
70 and mechanisms underlying associations of non-coding genetic variants. In contrast, the study of  
71 low-frequency nonsynonymous alleles has catalyzed translation from gene identification to  
72 therapeutic drug development, as illustrated by associations in *PCSK9* (9, 10), *LPA* (11), *APOC3*  
73 (12, 13) or *ANGPTL3* (14-16) with lipid phenotypes leading to rapid drug development for  
74 cardiovascular prevention (15, 17-22).

75       Previous genome-wide association studies of fat distribution in ~225,000 people have  
76 focused mostly on common variants (6). Rare variants, defined by the 1000 Genomes Project by  
77 minor allele frequency (MAF) below 0.5% (23), are usually population-specific (23) and difficult  
78 to impute (24), and hence their study requires large, homogeneous samples and direct  
79 genotyping. Their contribution to fat distribution remains understudied. A critical advantage of  
80 studying rare variants is that they represent mutational events which occurred more recently in a  
81 population (23), so that they tend to occur on long haplotypes together with more common  
82 variation with which correlation is low (25). This facilitates statistical fine-mapping aimed at  
83 identifying causal variants and distinguishing scenarios where the rare variant is causal rather  
84 than just a “passenger” in the association signal (25). Causal nonsynonymous variants in a gene  
85 provide a strong link between gene and phenotype and also a “genetic model” for functional  
86 studies aimed at understanding the underlying mechanism of association.

87        To exploit these properties, we conducted a genome-wide discovery scan of the association  
88        of rare nonsynonymous variants with body mass index-adjusted waist-to-hip ratio (BMI-adjusted  
89        WHR; a widely-used measure of body fat distribution (5, 6)) in 450,562 European ancestry  
90        individuals. We then conducted systematic analyses of genomic context to distinguish likely-  
91        causal from non-causal associations. The aim was to identify variants, genes and pathways  
92        implicated in the regulation of fat distribution in the general population.

93 **Results**

94 *Genome-wide scan of rare nonsynonymous variants and fine-mapping at identified loci*

95 We conducted a genome-wide association scan of 37,435 directly-genotyped, rare (MAF  
96 <0.5%) nonsynonymous variants with BMI-adjusted WHR in 450,562 European ancestry  
97 participants of UK Biobank (**SI Appendix Notes S1-S2, Tables S1-S2 and Fig. S1**). There was  
98 evidence of modest inflation of signal ( $\lambda=1.045$ ), consistent with polygenic contributions to BMI-  
99 adjusted WHR (**SI Appendix Fig. S2**). In the main analysis, we identified six associations at the  
100 genome-wide level of statistical significance ( $p<5\times 10^{-08}$ ) in genes at least 1 Mb apart of each  
101 other (**SI Appendix Table S3 and Fig. S2**). In addition to the main analysis, we also identified  
102 two additional signals in a women-specific analysis ( $p<5\times 10^{-08}$  in a women-only secondary  
103 analysis; **SI Appendix Table S3**) and two additional signals that met a Bonferroni-corrected  
104 statistical significance threshold in the sex-combined analysis (experiment-level  $p<1.3\times 10^{-06}$ , i.e.  
105 a correction for 37,435 variants tested; **SI Appendix Table S3**).

106 We conducted systematic analyses of genomic context to establish whether the identified  
107 rare nonsynonymous variants are likely to be causal for the association with BMI-adjusted WHR,  
108 including conditional analyses and fine-mapping of statistically-decomposed signals (**Methods**).  
109 Fine-mapping analyses provided strong statistical evidence for the causal association of rare  
110 nonsynonymous variants of *CALCRL*, *PLINI*, *PDE3B* and *ACVR1C* in the main analysis and of  
111 *FGF1* in the experiment-level statistical significance secondary analysis (**Table 1, Fig. 1, and SI**  
112 **Appendix Fig. S3**). Conversely, genomic context analyses were not consistent with causal  
113 associations for identified rare nonsynonymous variants in *ABHD15* (main analysis), *PYGM*  
114 (main analysis), *PLCB3* (experiment-level statistical significance and women-specific secondary  
115 analyses) or *FNIP1* (women-specific secondary analysis; all results in **SI Appendix Tables S3-**  
116 **S4 and Note S3**).

117 At *CALCRL*, there was evidence of two conditionally-independent signals (**Table 1, Fig. 1,**  
118 **and SI Appendix Table S5**), led by the rs10177093 common variant and by the rare p.L87P  
119 variant, respectively. Fine-mapping at the latter signal yielded a 99% credible set including only  
120 two variants, rs61739909 (*CALCRL* p.L87P, posterior probability of casual association  
121 [PPA]=51%) and rs180960888 (intronic to *CALCRL*, PPA=48.5%). Hence, p.L87P is the most  
122 likely causal variant and *CALCRL* the most likely causal gene for this signal. Previous genome-  
123 wide association studies had identified an association at this locus led by rs1569135 (6), which is  
124 in linkage disequilibrium with the lead common variant for the first signal in this larger analysis  
125 (rs10177093;  $R^2=0.74$ ). However, this association had not been linked to *CALCRL* via fine-  
126 mapping nor were nonsynonymous variants in this gene previously associated with any fat  
127 distribution phenotypes.

128 At *PLINI*, there was evidence of only one signal led by the rare p.L90P variant (**Table 1 and**  
129 **Fig. 1**), which was the only variant in the 99% credible set (PPA>99%; **Table 1**).

130 At *PDE3B*, there was evidence of three signals, the strongest of which was led by the  
131 rs150090666 p.R783X nonsense variant in *PDE3B*, which was the only variant in the 99%  
132 credible set (PPA>99%; **Table 1 and Fig. 1**). As part of an analysis focused on predicted loss-  
133 of-function variants in unrelated participants UK Biobank, Emdin et al. reported an association of  
134 rs150090666 with height and, in follow-up analyses, of a combination of predicted loss-of-  
135 function *PDE3B* variants with BMI-adjusted WHR which was below the genome-wide level of  
136 significance (26). In that study, the genomic context of the association with height, but not BMI-  
137 adjusted WHR, was considered. In this study, we included a larger sample of European ancestry  
138 participants (including related individuals) and optimally accounted for relatedness and  
139 population substructure using a mixed-model, finding a genome-wide significant association for  
140 rs150090666 with BMI-adjusted WHR, with fine-mapping providing the strongest possible

141 statistical evidence of causal association for this variant.

142 At *ACVR1C*, there was evidence of three distinct signals (**Table 1 and Fig. 1**). The rare  
143 p.I195T variant led one of the secondary signals at this region and was the only variant in the  
144 99% credible set (PPA>99%; **Table 1**). In addition, the primary signal at this region was led by a  
145 low-frequency missense variant in *ACVR1C* (rs55920843, p.N150H), which also had the highest  
146 posterior probability in fine-mapping of this signal (PPA>99%; **Table 1**). Hence, fine-mapping of  
147 conditionally-independent signals at this locus converges on *ACVR1C* as causal gene for body fat  
148 distribution and p.I195T and p.N150H as causal variants for the respective association peaks.

149 Additional consideration of subthreshold-signals that met the experiment-level Bonferroni  
150 correction showed evidence of six conditionally-independent signals in and around the *FGF1*  
151 gene, one of which was led by the rare p.G21E missense variant (PPA=98%; **Table 1 and SI**  
152 **Appendix Fig. S3**).

153 Given previous reports of sex-specific associations with BMI-adjusted WHR (6), we  
154 estimated stratified associations for likely-causal variants identified in our analysis and, in line  
155 with previous studies (6), found larger effect-size estimates in women compared to men, with a  
156 statistically-significant difference for rs150090666 p.R783X in *PDE3B* ( $p_{\text{heterogeneity}}=5.2\times 10^{-06}$ ; **SI**  
157 **Appendix Table S6**).

158 In a gene-based analysis, the burden of rare nonsynonymous alleles in *PLIN1*, the only gene  
159 with other rare nonsynonymous variants in addition to those found in the main analysis, was not  
160 associated with statistically-significant differences in BMI-adjusted WHR (**SI Appendix Table**  
161 **S7**).

162

163 *Functional annotation, structural modelling and associations with cardio-metabolic phenotypes*

164 We conducted detailed *in silico* analyses that predict functional impact of identified variants

165 **(SI Appendix Box S1 and Table S8)** and estimated their association with a variety of continuous  
166 cardio-metabolic traits and outcomes (**Fig. 2-3**), to gain insights into their likely function and  
167 phenotypic impact.

168 Genetic variants can affect fat distribution via increased abdominal fat (larger waist), reduced  
169 gluteofemoral fat (smaller hip) or both. The minor alleles of all four rare nonsynonymous variants  
170 in *CALCRL*, *PLINI*, *PDE3B*, and *ACVR1C* were associated with lower waist-to-hip ratio (i.e. a  
171 more favorable fat distribution) and larger hip circumference, but were not associated with waist  
172 circumference (**Fig. 2-3**). Certain genetic variants associated with greater gluteofemoral fat show  
173 associations with protection from cardio-metabolic disease, possibly by facilitating storage in  
174 more favorable fat depots (7). At the *CALCRL*, *PLINI*, *PDE3B*, and *ACVR1C* loci, two of the  
175 four rare nonsynonymous variants and six of nine total conditionally-independent WHR-lowering  
176 alleles were associated with protection from type 2 diabetes or coronary artery disease ( $p < 0.05$ ;  
177 **Fig. 2-3, SI Appendix Table S9**), suggesting that the identified variants may enhance the storage  
178 capacity of gluteofemoral adipose tissue. The four rare nonsynonymous variants were also  
179 associated with other cardio-metabolic phenotypes (**Fig. 2-3**), as described in more detail below.

180 The *CALCRL* p.L87P variant was associated with higher high-density lipoprotein cholesterol  
181 (HDL-C) and protection from coronary disease (**Fig. 2**). The variant occurs near a strictly  
182 conserved disulfide cross-link in this G-protein coupled receptor, but leucine 87 itself is not a  
183 conserved residue as it is replaced by proline in several species (**SI Appendix Box S1**),  
184 consistent with integrated evidence from sixteen *in silico* prediction algorithms (**SI Appendix**  
185 **Table S8**). This suggests that p.L87P has a mild functional impact on this G-protein coupled  
186 receptor the knock-out of which is embryonically-lethal in mice (**SI Appendix Box S1**) (27). The  
187 p.L90P variant in *PLINI*, occurring near the conserved serine 81 which is believed to be involved  
188 in the interaction of perilipin 1 with hormone sensitive lipase (**SI Appendix Box S1**), was



189 associated with higher overall adiposity and lower low-density lipoprotein cholesterol (LDL-C;  
190 **Fig. 2**). *In silico* prediction algorithms provide initial evidence of a likely-deleterious impact of  
191 this variant (**SI Appendix Table S8**). Loss-of-function mutations in *PLIN1* are associated with  
192 autosomal dominant forms of partial lipodystrophy with lack of gluteofemoral and leg fat, insulin  
193 resistance, dyslipidemia and type 2 diabetes (**SI Appendix Box S1**) (28). The nonsense p.R783X  
194 variant in *PDE3B* results in the premature truncation of phosphodiesterase 3B within its catalytic  
195 domain and structural modelling predicts the variant protein to be catalytically dead (**SI**  
196 **Appendix Box S1**). Phosphodiesterase 3B is a membrane-bound phosphodiesterase implicated in  
197 terminating intracellular lipolysis in response to insulin (29), hence an inactive enzyme would  
198 result in enhanced intracellular lipolysis at the sites where this phosphodiesterase is expressed.  
199 The variant was associated with approximately a quarter of a standard deviation lower BMI-  
200 adjusted WHR (an effect estimate six times greater than that of the strongest common variants  
201 identified in previous genome-wide association studies; **SI Appendix Fig. S4**), higher BMI and  
202 fat percentage, but lower blood pressure and lower triglycerides (**Fig. 2**). Nominal associations  
203 with protection from physician-diagnosed hypercholesterolemia and coronary artery disease have  
204 been reported for predicted loss-of-function variants in this gene (26), showing that loss-of-  
205 function of the gene may increase overall adiposity, but have protective associations with other  
206 cardio-metabolic traits (i.e. blood pressure, lipid levels, and coronary disease). In light of the  
207 statistical evidence for sex-specific association with BMI-adjusted WHR, we estimated  
208 associations of p.R783X with diabetes and coronary risk separately in men and women, but did  
209 not observe statistically-significant differences in risk for either sex (**SI Appendix Table S10**).

210 At *ACVR1C*, encoding a negative regulator of the peroxisome proliferator-activated receptor  
211 gamma (30), both p.N150H and p.I195T missense variants were associated with lower diastolic  
212 blood pressure and protection from type 2 diabetes (**Fig. 3**). On the basis of the three independent

213 lead variants at this locus (**Table 1**), each standard-deviation genetically-lower BMI-adjusted  
214 WHR via *ACVR1C* was associated with a 69% lower risk of type 2 diabetes (odds ratio, 0.31;  
215 95% confidence interval, 0.18 to 0.54;  $p=3.1\times 10^{-05}$ ). The p.I195T missense variant, which *in*  
216 *silico* software and structural modelling predict having a more deleterious functional impact than  
217 p.N150H (**SI Appendix Box S1 and Table S8**), also had greater phenotypic impact on WHR and  
218 diabetes risk (**Fig. 3**). At *FGF1*, we found an association for the rare WHR-lowering p.G21E  
219 allele with protection against coronary disease (**SI Appendix Fig. S5**).

220 Interestingly, all four genes implicated in the main analysis are abundantly expressed in  
221 subcutaneous and visceral adipose tissue in GTEx (31) and a review of functional evidence  
222 revealed links between each of the four encoded proteins and the regulation of intracellular  
223 lipolysis, the pathway responsible for the hydrolysis and release of intracellular fat from within  
224 mature cells (**SI Appendix Box S1**). Perilipin 1 and phosphodiesterase 3B are well established  
225 negative regulators of intracellular lipolysis (29, 32-34), *ACVR1C* has been experimentally  
226 shown to inhibit intracellular lipolysis in mouse adipocytes (30), while *CALCRL* is the receptor  
227 of adrenomedullin (35), which has been shown to stimulate intracellular lipolysis in human  
228 adipocytes (details in **SI Appendix Box S1**). We conducted hypothesis-free pathway-enrichment  
229 analyses using the likely-causal genes identified in this study and found evidence of enrichment  
230 for intracellular lipolysis genes ( $p_{\text{pathway-enrichment}}=0.00093$ ; **SI Appendix Table S11**), in addition  
231 to insulin-receptor related signaling pathways, which are established casual pathways in extreme  
232 and less severe forms of lipodystrophy (7, 36).

233

234 *Additional evidence of genetic associations at intracellular lipolysis genes*

235       These data led us to hypothesize that variants at enzymes catalyzing the three hydrolytic  
236 reactions of intracellular lipolysis or at their direct regulators might affect fat distribution (**Fig. 4**).  
237 To test this hypothesis, we performed targeted follow-up association analyses of all genetic  
238 variation within regions 1 Mb either side of five key genes regulating each of the three hydrolytic  
239 reactions in the pathway and also estimated associations of the burden of rare nonsynonymous  
240 variants in these genes (**Methods**). While there were no associations at *GOS2* or *LIPE*, there were  
241 strong associations at *MGLL*, *ABHD5* and *PNPLA2* ( $p < 5 \times 10^{-08}$ ). At *MGLL* and *ABHD5* the link  
242 between genetic associations and these lipolysis genes were unclear. The association at *MGLL*  
243 was in the shadow of an association peak over 2 Mb downstream of the gene, which was greatly  
244 attenuated after conditioning for the index-variants, suggesting that this signal is unlikely to be  
245 via this gene (**SI Appendix Fig. S6 and Table S12**). At *ABHD5*, there was evidence for one  
246 association peak led by a synonymous variant in the gene (rs141365045; **SI Appendix Table S13**  
247 **and Fig. S7**), which tags a low-frequency haplotype spanning the entire gene. The 99% credible  
248 set at this association signal comprises 42 variants in this haplotype that evenly share the PPA  
249 (PPA range 0.7%-3.3%), suggesting that any or a combination of these variants could be causal.  
250 The haplotype does not encompass nonsynonymous variants in the gene and the lead  
251 rs141365045 is associated with expression of the nearby *ANO10* and *SNRK-AS1* in thyroid tissue,  
252 but not *ABHD5* in GTEx (31).

253       We identified an association in *PNPLA2*, encoding adipose triglyceride lipase (ATGL) which  
254 is the enzyme responsible for the initiation of intracellular lipolysis (37) (**Fig. 4**). At the locus,  
255 there was evidence of two independent signals the strongest of which was led by a missense  
256 variant occurring near a splice-site junction in the gene (rs140201358-G p.N252K; MAF=1.4%;  
257 beta in standard deviations of BMI-adjusted WHR per minor allele [252K], 0.08; standard error,

258 0.009;  $p=2.5\times 10^{-22}$ ; **SI Appendix Table S13 and Fig. S7**). Associations were similarly strong in  
259 men and women ( $p_{\text{heterogeneity}}=0.10$ ; **SI Appendix Table S6**). Fine-mapping of the main signal in  
260 the region identified rs140201358 as the only variant in the 99% credible set, supporting a likely-  
261 causal association ( $\text{PPA}>99\%$ ; **SI Appendix Table S13 and Fig. S7**).

262 Follow-up analyses of the rs140201358-G p.N252K variant showed associations with lower  
263 BMI and smaller hip circumference, but higher triglycerides and LDL-C (**Fig. 5A**). Disease  
264 outcome association analyses revealed an association with higher risk of type 2 diabetes (odds  
265 ratio per 252K allele, 1.09; 95% confidence interval, 1.02-1.17;  $p=0.0073$ ) and coronary artery  
266 disease (odds ratio per 252K allele, 1.12; 95% confidence interval, 1.04-1.20;  $p=0.0019$ ; **Fig.**  
267 **5B**).

268 We conducted a number of *in vitro* experiments to provide an initial functional  
269 characterization of the possible mechanisms linking rs140201358 with fat distribution. *In vitro*  
270 experiments showed similar basal-, ABHD5 stimulated- and GOS2-inhibited enzyme activity as  
271 well as similar localization to lipid droplets between PNPLA2-N252K and wild-type PNPLA2  
272 (**Fig. 5C and SI Appendix Fig. S8**), in keeping with structural modelling (**SI Appendix Box**  
273 **S1**). However, the C>G substitution occurs at position -2 at the donor splice site of exon 6 in a  
274 partially-conserved nucleotide that is never substituted with a G in mammalian species,  
275 suggesting a possible impact on splicing (**Fig. 5D**). *In silico* software predicted this change to  
276 result in the creation of an exonic splicing silencer site, with higher probability of exon skipping  
277 (**Methods**). We hypothesized that if the variant affected the correct splicing of *PNPLA2*, this  
278 could alter allele-specific expression of *PNPLA2* in carriers. To assess this, we investigated the  
279 allele-specific expression of *PNPLA2* in subcutaneous adipose tissue from four unrelated  
280 heterozygous carriers of rs140201358-G from the Twins UK study. Across the four carriers, there  
281 were 2,032 reads of *PNPLA2* mRNA in subcutaneous adipose tissue. The number of reads

282 carrying the alternative G allele (i.e. 252K) was 21% lower than that of reads containing the wild-  
283 type C allele (observed reads, 900; expected, 1,016; two-tailed binomial  $p=2.9\times 10^{-07}$ ), with a  
284 statistically-significant within-individual difference in three out of four carriers ( $p<0.05$ ; **Fig.**  
285 **5E**). To assess impact on overall expression, we conducted quantitative polymerase chain  
286 reaction (Q-PCR) analyses of *PNPLA2* expression in peripheral blood mononuclear cells from  
287 106 homozygous carriers of the wild-type C allele and 26 heterozygous carriers of the alternative  
288 G allele from the Fenland study. Heterozygous carriers of the G allele had 0.39 standard  
289 deviations lower overall levels of *PNPLA2* mRNA compared to homozygous wild-type  
290 individuals (beta in standard deviations, -0.39; standard error, 0.15;  $p=0.011$ ; **Fig. 5F**). It remains  
291 to be established if associations with expression levels do reflect a splicing defect or result from  
292 other regulatory mechanisms due to rs140201358 or correlated variants.

293 In gene-based analyses, the one rare nonsynonymous variant in *PNPLA2* captured by  
294 genotyping (p.S407F) or 10 rare variants in the other intracellular lipolysis genes were not  
295 associated with statistically-significant differences in BMI-adjusted WHR (**SI Appendix Table**  
296 **S7**).

297 **Discussion**

298 By combining human genetics studies in over half a million people with *in silico* and *in vitro*  
299 functional analyses, we found evidence implicating intracellular lipolysis genes in the regulation  
300 of fat distribution and its cardio-metabolic consequences in the general population. This genetic  
301 study focused on a subset of genetic variation in order to maximize translational insights of  
302 genetic findings and is distinct from but complementary to genome-wide association studies  
303 assessing all genetic variants to clarify the overall genetic architecture of a trait. In addition,  
304 given the strict criteria for statistical significance and the systematic analysis of genomic context,  
305 all of the likely-causal alleles found in the main analysis would meet the strictest statistical  
306 significance thresholds recommended for genome-wide analyses of densely genotyped or  
307 imputed datasets, including those appropriate for the analysis of whole genome sequencing  
308 results (38). By identifying nonsynonymous alleles with high probability of being the causal  
309 variants underlying identified associations, this study provides (a) new and specific insights that  
310 go beyond the general notion of an impact of adipocyte function on body fat distribution and (b)  
311 a basis for the understanding of the molecular mechanisms behind these robust phenotypic  
312 associations. With fine-mapping, we show that five nonsynonymous variants at four of the  
313 identified genes (*PLIN1*, *PDE3B*, *ACVR1C*, and *PNPLA2*, found via targeted follow-up analysis)  
314 had >99% PPA, the highest possible statistical evidence of causal association.

315 Studies in rare forms of human lipodystrophy (36, 39), in experimental models (40-42) and  
316 recently also in the general population (7, 43-45) have implicated an impaired capacity to store  
317 fat in peripheral adipose compartments in cardio-metabolic disease. Our results highlight  
318 intracellular lipolysis as a novel mechanism linking impaired peripheral fat deposition to the risk  
319 of cardio-metabolic disease. Intracellular lipolysis is the biochemical process that regulates the  
320 release of fatty acid molecules from mature cells and its level of activation ultimately controls the

321 propensity of peripheral adipocytes, and other tissues, to retain energy stores in the form of fat  
322 (46, 47). Therefore, modulating this pathway determines where and how efficiently surplus  
323 energy is stored and thus the risk of the complications of sustained positive energy balance. In  
324 addition, in a secondary analysis of this study we found evidence of a likely-causal association  
325 with lower BMI-adjusted WHR of a rare missense variant in *FGF1*, a gene that murine  
326 experiments have implicated in the remodeling of adipose tissue in response to fluctuations in  
327 nutrient availability (48). In addition to previous evidence about the role of adipogenesis and  
328 intravascular lipolysis (7), findings from this study around intracellular lipolysis and the FGF1-  
329 pathway highlight the importance of adipose tissue plasticity in response to energy availability as  
330 a critical mechanism in the determination of fat distribution and its cardio-metabolic  
331 consequences.

332 All four likely-causal genes identified in our hypothesis-free main-analysis of rare,  
333 nonsynonymous variants have been implicated in intracellular lipolysis by orthogonal  
334 experimental evidence. In addition, a missense variant in *PNPLA2*, encoding the initiator of  
335 intracellular triglyceride hydrolysis, was associated with unfavorable fat distribution, higher  
336 atherogenic lipid levels and higher risk of type 2 diabetes and coronary artery disease further  
337 supporting the main findings from the scan of rare variants. Rare loss-of-function mutations in  
338 *PNPLA2* cause a recessively-inherited lipid storage disease characterized by ectopic fat  
339 deposition, known as neutral lipid storage disease with myopathy, which in some of the few  
340 reported cases has been associated with dyslipidemia and diabetes (49-52). Our study is  
341 consistent with a role of intracellular lipolysis genes in the aetiology of cardiovascular and  
342 metabolic disease in the general population, in line with an earlier study of the Amish population  
343 suggesting that a deletion in hormone sensitive lipase (*LIPE*), present in ~5% of Amish people  
344 but rarely detected in other populations, results in lower intracellular lipolysis, smaller

345 adipocytes, insulin resistance and higher diabetes risk (53).

346 Intracellular lipolysis is a pharmacologically modifiable pathway. The gene products of  
347 *ACVR1C* and *PNPLA2* have generated interest as potential drug targets for obesity and its  
348 complications (30, 54-57) on the basis of mouse models showing lower fat accumulation and  
349 improved glucose metabolism upon downregulation or pharmacologic inhibition of these  
350 proteins. In our human genetic studies, the peripheral adiposity-increasing alleles at these genes  
351 were associated with protection from diabetes (*ACVR1C* and *PNPLA2*) and coronary disease  
352 (*PNPLA2*). Hence, pharmacologically enhancing and not reducing peripheral fat deposition by  
353 modulating these genes could protect from cardio-metabolic disease in humans. In addition, the  
354 product of *PDE3B* is inhibited by cilostazol, a non-selective inhibitor of both phosphodiesterase  
355 3B and 3A used in cardiovascular medicine for its anti-platelet and vasodilating properties (58,  
356 59). The interaction between *PLIN1* and *ABHD5* can also be inhibited pharmacologically,  
357 resulting in enhanced *PNPLA2* activity (60). The association of variation in intracellular lipolysis  
358 genes with multiple cardio-metabolic risk factors and outcomes in our study provides human  
359 genetic evidence supporting further pharmacological development for this pathway. Also, the  
360 translational implications of the association of the *FGF1* p.G21E missense variant with fat  
361 distribution and protection from coronary disease deserve further exploration in light of the  
362 mounting therapeutic interest around this pathway (61, 62).

363 In conclusion, our study provides human genetic evidence of a link between genes involved  
364 in the regulation of intracellular lipolysis, fat-distribution and its cardio-metabolic complications  
365 in the general population.

366



## 367 **Methods**

### 368 *Study design and rationale*

369 The aim of this study was to identify likely-causal nonsynonymous genetic variants and  
370 genes implicated in the regulation of body fat distribution. We performed a hypothesis-free  
371 genome-wide scan of rare (MAF<0.5% in keeping with the 1000 Genomes Project definition  
372 (23)) nonsynonymous variants coupled with systematic conditional and fine-mapping analyses at  
373 identified loci. We focused on rare variants because (a) they facilitate fine-mapping approaches  
374 for causal variant identification (25) and (b) their contribution to fat distribution is understudied  
375 (6). Since these variants are usually population-specific (23) and difficult to impute (24), their  
376 study requires large, homogeneous samples and direct genotyping. For these reasons, we focused  
377 on variants that were directly-genotyped by array genotyping in a single, large population-based  
378 cohort, the UK Biobank study (63). Analyses were focused on individuals of European ancestry.  
379 We chose to focus on nonsynonymous variation as (a) disease-associated variants are enriched  
380 for nonsynonymous variants (38), (b) if a causal variant is a nonsynonymous variant in a gene,  
381 this provides strong evidence for the causal role of the gene (64) and (c) the identification of  
382 causal nonsynonymous variants facilitates downstream functional analyses aimed at  
383 understanding the underlying mechanisms of association. An overview of the study design is in

### 384 **SI Appendix Fig. S1.**

385

### 386 *Main and secondary analyses*

387 In the main analysis, we studied associations of rare (MAF<0.5%) nonsynonymous variants  
388 with BMI-adjusted WHR in a sex-combined analysis of 452,302 people using the conventional  
389 threshold of genome-wide statistical significance ( $p < 5 \times 10^{-08}$ ). In secondary analyses, we further  
390 considered (a) subthreshold associations with BMI-adjusted WHR that met an experiment-level

391 statistical significance threshold ( $p < 1.3 \times 10^{-06}$ ; corresponding to a Bonferroni correction for  
392 37,435 tested genetic variants) or (b) genome-wide significant associations ( $p < 5 \times 10^{-08}$ ) in sex-  
393 specific analyses in men or women-only.

394

### 395 *Studies and participants*

396 Genetic analyses were conducted in up to 452,302 European ancestry participants of UK  
397 Biobank who underwent genome-wide genotyping (**SI Appendix Table S2**). UK Biobank is a  
398 population-based cohort of 500,000 people aged between 40-69 years who were recruited in  
399 2006-2010 from centers across the United Kingdom (63). In UK Biobank, waist and hip  
400 circumference were measured using a Seca 200cm tape measure, height was measured using a  
401 Seca 240cm measure, while weight and body fat percentage were measured using a Tanita  
402 BC418MA body composition analyzer  
403 (<https://biobank.ctsu.ox.ac.uk/crystal/docs/Anthropometry.pdf>). Blood pressure and resting heart  
404 rate were measured using an Omron blood pressure monitor following a standardized procedure  
405 (<http://biobank.ctsu.ox.ac.uk/crystal/docs/Bloodpressure.pdf>). Type 2 diabetes was defined on the  
406 basis of self-reported physician diagnosis at nurse interview or digital questionnaire, age at  
407 diagnosis > 36 years, use of oral anti-diabetic medications and electronic health records (65).  
408 Coronary artery disease was defined as either (a) myocardial infarction or coronary disease in the  
409 participant's medical history documented by a trained nurse at the time of enrolment or (b)  
410 hospitalization or death involving acute myocardial infarction or its complications (i.e.  
411 International Statistical Classification of Diseases and Related Health Problems codes I21, I22 or  
412 I23), consistent with previous work (66, 67).

413 In addition to UK Biobank, genetic associations with type 2 diabetes were estimated from the  
414 EPIC-InterAct study (68) and the DIABetes Genetics Replication And Meta-analysis (69)

415 (DIAGRAM), with a maximum sample size of 47,008 cases and 492,962 controls. In addition to  
416 UK Biobank, genetic associations with coronary artery disease were estimated from the  
417 CARDIoGRAMplusC4D consortium (70), with a maximum sample size of 85,358 cases and  
418 551,249 controls. Lipid traits associations were from up to 304,873 participants of the Global  
419 Lipids Genetics Consortium (71, 72). Associations with lipid traits for the p.R783X variant in  
420 *PDE3B*, which was not studied in the Global Lipids Genetics Consortium, were estimated in a  
421 meta-analysis of genetic associations in the Fenland (73), EPIC-Norfolk cohorts (74) and EPIC-  
422 InterAct subcohort (68). Descriptions of the cohorts participating in each analysis and of the  
423 sources of data are presented in **SI Appendix Table S1 and Note S1**. Ethical approvals were  
424 obtained at each study site and informed consent was obtained from all participants.

425

#### 426 *Genome-wide association scan of rare nonsynonymous genetic variants*

427 Similar to previous genetic studies (1, 5, 6), the BMI-adjusted WHR phenotype was  
428 constructed as the ratio of waist and hip circumferences adjusted for age, age<sup>2</sup> and BMI.  
429 Residuals were calculated for men and women separately and then transformed by the inverse  
430 standard normal function. Adjustment for BMI has been suggested to possibly result in spurious  
431 associations with higher BMI-adjusted WHR of variants primarily associated with lower BMI  
432 (via collider bias) (75). However, likely-causal nonsynonymous variants at *CALCRL*, *PLIN1*,  
433 *PDE3B*, *ACVR1C*, *FGF1* and *PNPLA2*, were all also strongly associated with WHR not adjusted  
434 for BMI, with stronger associations than with BMI, consistent with a genuine and primary  
435 association with fat distribution (**Fig. 2-3, 5A and SI Appendix Fig. S5**). Genetic variants were  
436 genotyped in UK Biobank using the Affymetrix UK BiLEVE or the Affymetrix UK Biobank  
437 Axiom arrays (76). Genotyping underwent quality control procedures including (a) routine  
438 quality checks carried out during the process of sample retrieval, DNA extraction, and genotype

439 calling; (b) checks and filters for genotype batch effects, plate effects, departures from Hardy-  
440 Weinberg equilibrium, sex effects, array effects, and discordance across control replicates; (c)  
441 individual and genetic variant call rate filters (76). We further excluded genetic variants with a  
442 genotype call rate below 95% and variants that were not rare or nonsynonymous. A total of  
443 37,435 genetic variants in 12,355 genes were available for analysis. Genomic annotations were  
444 performed using the Annovar software (77). Genome-wide association analyses in 450,562  
445 participants of European Ancestry were conducted using the BOLT-LMM software (78). BOLT-  
446 LMM fits linear mixed models that account for relatedness between individuals using a genomic  
447 relationship matrix, adjusting for relatedness and population stratification (78). Full details of  
448 these genetic analyses are in **SI Appendix Note S2**.

449

#### 450 *Conditional analyses and fine-mapping*

451 At each associated genomic region, we conducted systematic analyses of the genomic context  
452 of associations. Our goal was to establish whether or not the identified rare nonsynonymous  
453 variants are likely to be the causal variants for the association with BMI-adjusted WHR. At each  
454 region 1 Mb either side of the nonsynonymous genetic variants associated with BMI-adjusted  
455 WHR, we conducted both approximate and formal conditional analyses. We considered the  
456 association of all genetic variants in the regions regardless of functional annotation or allele  
457 frequency using directly-genotyped and densely-imputed data using the Haplotype Reference  
458 Consortium. First, approximate conditional analyses were conducted on summary-level estimates  
459 using GCTA (79) to identify sets of conditionally-independent index genetic variants ( $p < 5 \times 10^{-08}$   
460 in the main or in sex-specific analyses and  $p < 1.3 \times 10^{-06}$  in analyses using experiment-level  
461 statistical significance). Individual-level genotypes for the conditionally-independent variants  
462 identified in this first step were then extracted in 350,721 unrelated European ancestry

463 participants of UK Biobank and their independent association was confirmed in multivariable  
464 linear regression models including all variants put forward from approximate analyses. Then, at  
465 each region, we statistically decomposed the identified index signals by conditioning for the other  
466 conditionally-independent index variants. We then performed Bayesian fine-mapping (80) to  
467 estimate the posterior probability of association for each variant (PPA, where 0% indicates that  
468 the variant is not causal and 100% indicates the highest possible posterior probability that the  
469 variant is causal) and define the 99% credible set at that signal (i.e. a set of variants in a genomic  
470 window that accounts for 99% of the PPA at that association signal). To perform credible set  
471 mapping, the association results at each locus were converted to Bayes factors (BF) for each  
472 variant within the locus boundary. The posterior probability that a variant- $j$  was causal was  
473 defined by:

$$\varphi_j = \frac{BF_j}{\sum_k BF_k}$$

474 where,  $BF_j$  denotes the BF for the  $j$ th variant, and the denominator is the sum of BFs for all  
475 included variants at that signal. A 99% credible set of variants was created by ranking the  
476 posterior probabilities from highest to lowest and summing them until the cumulative posterior  
477 probability exceeded 0.99 (i.e. 99%).

478

#### 479 *Additional associations with BMI-adjusted WHR at intracellular lipolysis regulators*

480 The findings from our rare-variant scan led us to hypothesize that variation at key enzymes  
481 of the intracellular lipolytic pathway might affect fat distribution (**Fig. 4**). To test this hypothesis,  
482 we systematically investigated variation in and around the key regulators of each of the three  
483 enzymatic reactions in intracellular lipolysis (46): *PNPLA2*, *ABHD5*, *GOS2*, *LIPE*, and *MGLL*.  
484 *PNPLA2* encodes adipose triglyceride lipase (PNPLA2 or ATGL), the main enzyme for

485 triglyceride hydrolysis; *ABHD5* encodes Alpha-Beta Hydrolase Domain Containing 5 also known  
486 as Comparative Gene Identification-58 (CGI-58), the activator of PNPLA2; *GOS2* encodes  
487 G0/G1 Switch 2, the inhibitor of PNPLA2; *LIPE* encodes hormone sensitive lipase, the main  
488 enzyme for diglyceride hydrolysis; *MGLL* encodes monoglyceride lipase, the main enzyme for  
489 monoacylglyceride hydrolysis. For each of these gene regions we estimated their associations  
490 with BMI-adjusted WHR for all variants that were either directly genotyped or imputed using the  
491 Haplotype Reference Consortium in the region defined by 1 Mb either side of the gene  
492 boundaries.

493

#### 494 *Gene-based analyses*

495 For the four likely-causal genes identified in the main analysis (*CALCRL*, *PLIN1*, *PDE3B*  
496 and *ACVR1C*) and the five key intracellular lipolysis genes (*ABHD5*, *GOS2*, *PNPLA2*, *LIPE* and  
497 *MGLL*) we sought to estimate the association with BMI-adjusted WHR of the burden of rare  
498 nonsynonymous variants. We extracted genotypes of independent ( $R^2 < 0.01$ ) rare nonsynonymous  
499 variants in 350,721 unrelated European ancestry participants of UK Biobank with available BMI-  
500 adjusted WHR and estimated the burden of these variants using linear regression adjusted for age,  
501 sex and genetic principal components comparing carriers to non-carriers of these rare alleles.

502

#### 503 *Structural modelling, functional prediction of identified nonsynonymous variants, pathway* 504 *enrichment analyses*

505 Models were built with the MODELLER software (81). Sequence alignment was achieved  
506 by HHpred, MUSCLE and Blast algorithms implemented in MPI toolkit (82). Paralogues and  
507 orthologues were extracted from Orthologous Matrix database (83), and displayed and edited in

508 Jalview (84). Structures are displayed using MolSoft Browser-Pro software (URL:  
509 [http://www.molsoft.com/icm\\_browser\\_pro.html](http://www.molsoft.com/icm_browser_pro.html)).

510 We used the Annovar (77) to generate annotations that predict deleteriousness of amino acid  
511 changes. We generated the summary results of sixteen computational algorithms that predict  
512 whether or not an amino acid change is likely to be deleterious to the function of the encoded  
513 protein. For each of these algorithms, the prediction of likely functional impact contributed to an  
514 overall score of predicted deleteriousness (see **SI Appendix Table S8** for details on the  
515 algorithms and scoring criteria).

516 We investigated the expression of the likely-causal genes in 53 tissues from the Genotype-  
517 Tissue Expression (GTEx) consortium (31). Data were accessed from the online portal (URL:  
518 <https://www.gtexportal.org/home/>) on the 1<sup>st</sup> of September 2017.

519 We performed pathway enrichment analyses using the ConsensusPathDB software  
520 (<http://cpdb.molgen.mpg.de/>) (85). The software integrates data from 32 public databases to  
521 identify pathways that are over-represented in a given gene list, providing a p-value for  
522 enrichment compared to what expected by chance given the number of genes in the list and the  
523 prevalence of genes of a given pathway in the list of interrogated genes (in this case the list of  
524 12,355 genes available for analysis).

525

526 *Initial functional characterization of the PNPLA2 p.N252K variant*

527       Given the central role of *PNPLA2* in intracellular lipolysis and the existence of established  
528 experimental protocols for studying the impact of variants of this gene on hydrolytic activity  
529 (86), we investigated the impact of the p.N252K variant. Green monkey kidney (Cos-7, ATCC  
530 and CRL-165) cells were seeded at 900,000 cells per 10 cm dish and transfected with: (a) human  
531 wild-type *PNPLA2* tagged with yellow fluorescent protein, (b) human *PNPLA2*-N252K, and (c)  
532 *LacZ* as a control using Metafectene. Twenty-eight hours after transfection, cells were harvested  
533 in 300  $\mu$ L HSL-buffer plus pi and disrupted by sonication. After centrifugation at 2000 g for 10  
534 minutes at 4°C, protein concentration was determined using Bradford reagent and bovine serum  
535 albumin as a standard. Expression of human wild-type *PNPLA2* and human *PNPLA2*-N252K  
536 was verified by Western Blotting analysis. Triglyceride hydrolase activity assay was performed  
537 as described previously (87). A total of 20  $\mu$ g of Cos-7 lysates containing overexpressed human  
538 wild-type *PNPLA2*, human *PNPLA2*-N252K or *LacZ* as a control were incubated with 1 $\mu$ g  
539 purified CGI-58 (ABHD5) or 1.5  $\mu$ g purified GOS2 and radiolabeled Triolein emulsified with  
540 PC/PI (0.5 mM, 20  $\mu$ Ci/ $\mu$ mol) for one hour at 37°C. Radioactivity present in the extracted fatty  
541 acids was determined using liquid scintillation counting. Activity was measured in three technical  
542 replicates, has been corrected for Cos-7 background activity (*LacZ*) and is presented as mean and  
543 individual results of three technical replicates.

544       We also investigated the intracellular localization of wild-type and mutant *PNPLA2*. Cos-7  
545 cells were seeded onto coverslips in 12 well tissue culture plates with a density of 60,000 cells  
546 per well and transfected with the following constructs: (a) human wild-type *PNPLA2* tagged with  
547 yellow fluorescent protein, (b) human *PNPLA2*-N252K, (c) human *PNPLA2*-S47A, which is a  
548 catalytically inactive variant, (d) human *PNPLA2* with both the N252K and S47A variants.  
549 Constructs were generated by site-directed mutagenesis using the Agilent primer design software



550 and the QuickChangeII XL Kit following manufacturer's instructions. 400  $\mu$ M oleic acid  
551 conjugated with BSA was supplemented 4 hours after transfection for 20 hours to promote lipid  
552 droplet formation. Cells were fixed with 4% formaldehyde for 15 minutes, followed by three  
553 washes in PBS, and incubated with LipidTox DeepRed 633 for 1 hour for lipid droplet staining.  
554 Cells were mounted on microscope slides with ProLong Gold Antifade Mountant and the yellow  
555 fluorescent protein-tagged PNPLA2 localization was determined using the Leica TCS SP8  
556 confocal microscope with a 63X immersion oil objective (1.3 NA). Yellow fluorescent protein  
557 fluorescence was excited at 514 nm and emission was detected between 520 and 545 nm.  
558 LipidTox DeepRed was excited at 633 nm and detected between 640–680 nm.

559 The expression of yellow fluorescent protein-PNPLA2 transfected into Cos-7 cells was  
560 determined by immunoblotting as previously described (33, 86). Briefly, cells were rinsed twice  
561 with ice-cold PBS and lysed in RIPA buffer supplemented with protease inhibitors. Cell debris  
562 was spun down at 13,000 RPM for 10 minutes at 4C. Typically, 15-20  $\mu$ g of the clarified lysate  
563 was resolved and transferred onto nitrocellulose membrane using the NuPAGE Bis-tris SDS  
564 PAGE/IBlot system (Invitrogen) with yellow fluorescent protein tagged-PNPLA2 being detected  
565 using an anti-GFP antibody (Roche) and GAPDH (GeneTex) serving as loading control.

566

#### 567 *Impact of the rs140201358-G PNPLA2 variant on gene expression*

568 Splicing consequences for the *rs140201358-G* variant were predicted using the Human  
569 Splicing Finder software (88), while the likelihood of exon skipping was predicted using the EX-  
570 SKIP software (89).

571 Allele-specific expression of *PNPLA2* in adipose tissue was investigated in four unrelated  
572 heterozygous carriers from 477 female participants of the TwinsUK cohort using paired whole  
573 genome sequence and RNAseq data. Phased whole-genome sequence (6X) was generated as

574 described in the UK10K project (90). RNAseq data from subcutaneous adipose tissue was  
575 generated as described in Buil and colleagues (91). Raw RNA reads were aligned to personal  
576 genomes using the following strategy. The phased whole genome sequences from UK10K were  
577 re-aligned to the human genome build GRCh37/hg37 to create diploid personal genomes for each  
578 sample using vcf2diploid (92). RNAseq reads were processed as follows. Adapter sequences  
579 were trimmed from RNA-seq reads using TrimGalore, software that combines Cutadapt (93) and  
580 FastQC (URL: <https://www.bioinformatics.babraham.ac.uk/projects/fastqc/>). Trimmed sequences  
581 with less than 20 bases or which had Phred score below 1 were excluded. Poly-A tails longer than  
582 4bp were trimmed with PRINSEQ-lite (94). Processed reads were then aligned to the  
583 corresponding personal diploid genomes using Spliced Transcripts Alignment to a Reference  
584 (STAR) (95). Pairing of RNA-seq reads was evaluated for a Mapping Quality (MAPQ) score  
585 above 30 and a maximum mismatch threshold of 5. Genomic locations of the reads of personal  
586 genomes were crosslinked to their genome locations on the reference genome with CrossMap  
587 v.0.2.3 (96). A read's haplotype origin was assigned to either the haplotype with the least number  
588 of mismatches or assigned randomly to break ties. Uniquely mapped reads were retained and the  
589 number of reads mapping to each haplotype was quantified with ASEReadCounter (97). We  
590 tested for differential expression of the two alleles of rs140201358 (C or G) in individual carriers  
591 and in pooled data from four unrelated carriers by calculating the two-sided binomial probability  
592 of observed reads mapping to the G allele assuming an expected probability of 0.5.

593 Peripheral blood mononuclear cells (PBMCs) were isolated from 1,084 participants of the  
594 population based Fenland study (7, 73) using Ficoll-Paque (VWR International Ltd) gradient  
595 centrifugation from 20 mL sodium citrate whole blood. After washing with DPBS (Sigma-  
596 Aldrich Co Ltd), cells were re-suspended in 1 mL KOSR/DMSO (Sigma-Aldrich Co Ltd) at a  
597 concentration of approximately  $1 \times 10^7$  cells/mL. Vials were frozen to  $-80$  °C in a controlled

598 container and then transferred to liquid nitrogen. Expression of *PNPLA2* was measured by  
599 quantitative polymerase chain reaction (Q-PCR) in 26 heterozygous carriers of the alternative G  
600 allele, constituting all carriers with available PBMCs, and a random selection of 106 homozygous  
601 carriers of the wild-type C allele. Briefly, RNA was extracted from 1-2 million PBMCs using the  
602 RNeasy Plus Micro Kit (Qiagen), following the manufacturer's protocol. A total of 0.1  $\mu$ g RNA  
603 was reverse transcribed to cDNA using M-MLV reverse transcriptase (Promega). Q-PCR was  
604 performed to determine the mRNA expression levels of *PNPLA2* and housekeeping gene  
605 hypoxanthine phosphoribosyltransferase 1 (*HPRT1*) from undiluted cDNA with TaqMan gene  
606 expression assays (ThermoFisher Scientific, Hs00386101\_m1 and Hs02800695\_m1,  
607 respectively), and TaqMan Universal PCR Master Mix. The mRNA expression of *PNPLA2* from  
608 each PBMC was normalized to *HPRT1* expression using a standard curve. Measures were carried  
609 out in two technical replicates. *PNPLA2* mRNA levels were standardized to a mean of 0 and a  
610 standard deviation of 1 using the distribution in wild-type homozygous carriers. The association  
611 of genotype status with *PNPLA2* mRNA levels was estimated using repeated measures general  
612 linear regression to account for duplicate measures.

613

#### 614 *Statistical analysis*

615 Genetic associations were estimated using linear mixed models, linear regression or logistic  
616 regression as appropriate for the outcome phenotype and study design. Results were scaled to  
617 represent the beta estimate in standardized units for continuous outcomes or the odds ratio for  
618 binary outcomes per allele. At the *ACVR1C* gene, associations of genetically-determined body fat  
619 distribution with type 2 diabetes of multiple genetic variants were estimated using an inverse  
620 variance weighted approach (98). Estimates of (1) *ACVR1C* genetic variant to BMI-adjusted  
621 WHR and (2) *ACVR1C* genetic variant to diabetes associations were used to calculate estimates

622 of (3) genetically-higher BMI-adjusted WHR via *ACVR1C* to diabetes association. Statistical  
623 analyses were conducted using BOLT-LMM (78) and STATA v14.2 (StataCorp, College Station,  
624 Texas 77845 USA).

625

626 *Data availability*

627

628 This research has been conducted using the UK Biobank resource. Access to the UK Biobank  
629 genotype and phenotype data is open to all approved health researchers  
630 (<http://www.ukbiobank.ac.uk/>).

631

632 Data download:

633 DIAGRAM consortium (<http://diagram-consortium.org/>)

634 CARDIoGRAMplusC4D (<http://www.cardiogramplusc4d.org/>)

635 GLGC consortium (<http://csg.sph.umich.edu//abecasis/public/lipids2013/>;

636 <http://csg.sph.umich.edu//abecasis/public/lipids2017/>)

637

638 Study websites:

639 UK Biobank (<http://www.ukbiobank.ac.uk/>)

640 EPIC-InterAct (<http://www.inter-act.eu/>)

641 Twins UK (<http://www.twinsuk.ac.uk/>)

642 Fenland (<http://www.mrc-epid.cam.ac.uk/research/studies/fenland/>)

643 EPIC-Norfolk (<http://www.srl.cam.ac.uk/epic/>)

644

645 Online data or software:

646 Human Splicing Finder (<http://www.umd.be/HSF3/>)

647 EX-SKIP (<http://ex-skip.img.cas.cz/>)

648 FastQC (<https://www.bioinformatics.babraham.ac.uk/projects/fastqc/>)

649 MolSoft Browser-Pro ([http://www.molsoft.com/icm\\_browser\\_pro.html](http://www.molsoft.com/icm_browser_pro.html))

650 ConsensusPathDB (<http://cpdb.molgen.mpg.de/>)

651 Genotype-Tissue Expression (GTEx) consortium (<https://www.gtexportal.org/home/>)

## 652 **Acknowledgement**

653 This research has been conducted using the UK Biobank resource. Access to the UK Biobank genotype  
654 and phenotype data is open to all approved health researchers (<http://www.ukbiobank.ac.uk/>). This study  
655 was funded by the United Kingdom's Medical Research Council through grants MC\_UU\_12015/1,  
656 MC\_PC\_13046, MC\_PC\_13048 and MR/L00002/1. This work was supported by the MRC Metabolic  
657 Diseases Unit (MC\_UU\_12012/5) and the Cambridge NIHR Biomedical Research Centre and EU/EFPIA  
658 Innovative Medicines Initiative Joint Undertaking (EMIF grant: 115372). Data from the EPIC-InterAct  
659 study contributed to this study. EPIC-InterAct Study funding: funding for the InterAct project was  
660 provided by the EU FP6 programme (grant number LSHM\_CT\_2006\_037197). D.B.S. and S.O'R. are  
661 supported by the Wellcome Trust (WT107064 and WT 095515 respectively) the MRC Metabolic Disease  
662 Unit, the National Institute for Health Research (NIHR) Cambridge Biomedical Research Centre and the  
663 NIHR Rare Disease Translational Research Collaboration. K.S.S. is supported by MRC Project Grant  
664 L01999X/1. The TwinsUK study was funded by the Wellcome Trust and European Community's  
665 Seventh Framework Programme (FP7/2007-2013). The TwinsUK study also receives support from the  
666 National Institute for Health Research (NIHR)- funded BioResource, Clinical Research Facility and  
667 Biomedical Research Centre based at Guy's and St Thomas' NHS Foundation Trust in partnership with  
668 King's College London. Some computation was enabled through access granted to K.S.S. to the MRC  
669 eMedLab Medical Bioinformatics infrastructure, supported by the Medical Research Council (grant  
670 number MR/L016311/1). M. I. McC. is a Wellcome Senior Investigator supported by Wellcome grants  
671 098381, 090532, 106130, 203141. M. I. McC. was supported by the National Institute for Health Research  
672 (NIHR) Oxford Biomedical Research Centre (BRC) and the views expressed in this article are those of the  
673 author(s) and not necessarily those of the NHS, the NIHR, or the Department of Health. Dr. R. A. S. is an  
674 employee and shareholder of GlaxoSmithKline Plc. (GSK). The authors gratefully acknowledge the help  
675 of the MRC Epidemiology Unit Support Teams, including Field, Laboratory and Data Management  
676 Teams.  
677

## Tables

**Table 1. Conditionally independent index variants and fine-mapping at the *CALCRL*, *PLINI*, *PDE3B*, *ACVR1C* and *FGF1* loci.**

| Locus                                     | Signal | dbSNP rsID  | Genomic coordinate, chromosome, position, effect allele, other allele (effect allele frequency, %) | Annotation               | Beta (SE) from univariate analysis, in SD units | p-value univariate analysis | Beta (SE) from conditional analysis*, in SD units | p-value conditional analysis* | Genomic position of 99% credible set window, (width in number of base pairs) | Number of variants in the credible set | PPA for the index variant, % |
|-------------------------------------------|--------|-------------|----------------------------------------------------------------------------------------------------|--------------------------|-------------------------------------------------|-----------------------------|---------------------------------------------------|-------------------------------|------------------------------------------------------------------------------|----------------------------------------|------------------------------|
| <i>Main analysis</i>                      |        |             |                                                                                                    |                          |                                                 |                             |                                                   |                               |                                                                              |                                        |                              |
| <i>CALCRL</i>                             | 1      | rs10177093  | chr2:188213819:G:T (45.6%)                                                                         | <i>CALCRL</i> intronic   | -0.02 (0.002)                                   | $2.2 \times 10^{-27}$       | -0.02 (0.002)                                     | $7.7 \times 10^{-26}$         | 188088527-188213819 (125,293)                                                | 60                                     | 17%                          |
|                                           | 2‡     | rs61739909  | chr2:188245439:G:A (0.3%)                                                                          | <i>CALCRL</i> p.L87P     | -0.13 (0.018)                                   | $2.0 \times 10^{-13}$       | -0.12 (0.018)                                     | $5.9 \times 10^{-12}$         | 188245439-188270259 (24,821)                                                 | 2                                      | 51%                          |
| <i>PLINI</i>                              | 1‡     | rs139271800 | chr15:90214777:G:A (0.1%)                                                                          | <i>PLINI</i> p.L90P      | -0.21 (0.029)                                   | $5.5 \times 10^{-13}$       | -0.21 (0.029)                                     | $5.5 \times 10^{-13}$         | 90214777 (1)                                                                 | 1                                      | >99%                         |
| <i>PDE3B</i>                              | 1‡     | rs150090666 | chr11:14865399:T:C (0.1%)                                                                          | <i>PDE3B</i> p.R783X     | -0.26 (0.032)                                   | $1.4 \times 10^{-15}$       | -0.25 (0.032)                                     | $6.2 \times 10^{-15}$         | 14865399 (1)                                                                 | 1                                      | >99%                         |
|                                           | 2      | rs2970332   | chr11:14360435:G:A (23.1%)                                                                         | <i>RRAS2</i> intronic    | -0.02 (0.002)                                   | $9.9 \times 10^{-12}$       | -0.02 (0.002)                                     | $6.3 \times 10^{-12}$         | 14258010-14689340 (431,331)                                                  | 20                                     | 23%                          |
|                                           | 3      | rs79634051  | chr11:14561945:C:G (2.8%)                                                                          | <i>PSMA1</i> intronic    | -0.03 (0.006)                                   | $6.4 \times 10^{-08}$       | -0.04 (0.006)                                     | $2.1 \times 10^{-09}$         | 14242862-14891141 (648,280)                                                  | 15                                     | 78%                          |
| <i>ACVR1C</i>                             | 1      | rs55920843  | chr2:158412701:G:T (1.2%)                                                                          | <i>ACVR1C</i> p.N150H    | -0.08 (0.009)                                   | $8.9 \times 10^{-19}$       | -0.09 (0.009)                                     | $4.6 \times 10^{-20}$         | 158412701 (1)                                                                | 1                                      | >99%                         |
|                                           | 2      | rs2444770   | chr2:158503739:C:T (14.8%)                                                                         | 18kb 5' of <i>ACVR1C</i> | -0.02 (0.003)                                   | $5.9 \times 10^{-13}$       | -0.02 (0.003)                                     | $7.7 \times 10^{-15}$         | 158496502-158518238 (21,737)                                                 | 7                                      | 46%                          |
|                                           | 3‡     | rs56188432  | chr2:158406865:G:A (0.2%)                                                                          | <i>ACVR1C</i> p.I195T    | -0.14 (0.021)                                   | $4.9 \times 10^{-11}$       | -0.14 (0.021)                                     | $5.4 \times 10^{-12}$         | 158406865 (1)                                                                | 1                                      | >99%                         |
| <i>Experiment-level p-value analysis†</i> |        |             |                                                                                                    |                          |                                                 |                             |                                                   |                               |                                                                              |                                        |                              |
| <i>FGF1</i>                               | 1      | rs10477191  | chr5:142077715:A:G (95.1%)                                                                         | 79bp 5' of <i>FGF1</i>   | -0.04 (0.005)                                   | $5.5 \times 10^{-17}$       | -0.04 (0.005)                                     | $7.1 \times 10^{-16}$         | 142077715 (1)                                                                | 1                                      | >99%                         |
|                                           | 2      | rs7712968   | chr5:142086214:T:C (93.3%)                                                                         | 8.6kb 5' of <i>FGF1</i>  | -0.03 (0.004)                                   | $1.3 \times 10^{-12}$       | -0.03 (0.004)                                     | $3.5 \times 10^{-11}$         | 142082930-142101101 (18,172)                                                 | 5                                      | 58%                          |
|                                           | 3      | rs34000     | chr5:141973501:T:C                                                                                 | 3'-UTR of                | 0.01                                            | $1.2 \times 10^{-10}$       | 0.01                                              | $9.9 \times 10^{-08}$         | 141480886-                                                                   | 192                                    | 30%                          |

|  |                |            |                               |                            |                  |                       |                  |                       |                                      |    |     |
|--|----------------|------------|-------------------------------|----------------------------|------------------|-----------------------|------------------|-----------------------|--------------------------------------|----|-----|
|  |                |            | (59.6%)                       | <i>FGF1</i>                | (0.002)          |                       | (0.002)          |                       | 142470008<br>(989,123)               |    |     |
|  | 4              | rs10065321 | chr5:141857415:C:T<br>(58.3%) | 114kb 3' of<br><i>FGF1</i> | 0.01<br>(0.002)  | $1.3 \times 10^{-09}$ | 0.01<br>(0.002)  | $3.8 \times 10^{-10}$ | 141857415-<br>141861399<br>(3,985)   | 5  | 55% |
|  | 5              | rs2434416  | chr5:141789701:A:C<br>(56.2%) | 85kb 5' of<br><i>SPRY4</i> | -0.01<br>(0.002) | $8.3 \times 10^{-09}$ | -0.01<br>(0.002) | $1.5 \times 10^{-09}$ | 141769319-<br>141824669<br>(55,351)  | 34 | 22% |
|  | 6 <sup>‡</sup> | rs17223632 | chr5:141993631:T:C<br>(0.3%)  | <i>FGF1</i><br>p.G21E      | -0.10<br>(0.018) | $8.1 \times 10^{-08}$ | -0.09<br>(0.018) | $1.6 \times 10^{-07}$ | 141589594-<br>142413739<br>(824,146) | 62 | 98% |

Analyses are from 450,562 European ancestry individuals. Beta and standard errors are in standardized units of BMI-adjusted WHR per copy of the effect allele. Genomic coordinates according to human genome reference sequence GRCh37.

\* Adjusting for conditionally-independent index variants highlighted in the joint conditional model.

† Using a p-value threshold  $p < 1.3 \times 10^{-06}$ , corresponding to a Bonferroni correction for 37,435 genetic variants studied in this analysis.

Abbreviations: SE, standard error; SD, standard deviation.

‡ Variant identified in the genome-wide scan of rare nonsynonymous variants.

Abbreviations: SE, standard error; SD, standard deviation; PPA, posterior probability of association.

## Figure Legends

**Figure 1. Regional association plots of the overall and statistically-decomposed signals at the *CALCR1*, *PLIN1*, *PDE3B* and *ACVR1C* genes.** Plots were drawn using LocusZoom (99). Joint meta-analysis models using GCTA (79) were used at each locus to assess how many independent signals were present. Then, at each locus each signal was statistically-decomposed from others by estimating associations of all variants in the region adjusted for all other index variants at the region. Fine-mapping of each signal was performed using a Bayesian approach (80).

**Figure 2. Association of rare nonsynonymous genetic variants at *CALCR1*, *PLIN1* and *PDE3B* with continuous metabolic traits and risk of cardio-metabolic disease outcomes.** Associations are presented as beta coefficient in standardized units of continuous trait or odds ratio for disease outcome per minor allele. The minor allele is listed following the rsid above the corresponding plot. Lipid association estimates were not available for rs150090666 in the Global Lipids Genetics Consortium, so they were estimated in the Fenland, InterAct and EPIC-Norfolk studies. Abbreviations: WHR, waist to hip ratio *unadjusted* for body mass index; Waist, waist circumference; Hip, hip circumference; BMI, body mass index; BF %, body fat percentage; SBP, systolic blood pressure; DBP, diastolic blood pressure; LDL-C, low-density lipoprotein cholesterol; HDL-C, high-density lipoprotein cholesterol; SD, standard deviation; OR, odds ratio.

**Figure 3. Associations with continuous metabolic traits and risk of cardio-metabolic disease outcomes of genetic variants at the *ACVR1C* gene.** The three genetic variants were independently associated with waist-to-hip ratio adjusted for body mass index in conditional analyses at the *ACVR1C* gene. Associations are presented as beta coefficient in standardized units of continuous trait or odds ratio for disease outcome per minor allele. The minor allele is listed following the rsid above the corresponding plot. Abbreviations: WHR, waist to hip ratio *unadjusted* for body mass index; Waist, waist circumference; Hip, hip circumference; BMI, body mass index; BF %, body fat percentage; SBP, systolic blood pressure; DBP, diastolic blood pressure; LDL-C, low-density lipoprotein cholesterol; HDL-C, high-density lipoprotein cholesterol; SD, standard deviation; OR, odds ratio.

**Figure 4. Schematic depiction of the three catalytic reactions of intracellular lipolysis and key genes in the pathway.** Evidence contributing to this representation has been recently reviewed (46).

**Figure 5. Phenotypic associations and functional consequences of the rs140201358-G variant in *PNPLA2*.** **Panel A** reports associations with continuous traits of rs140201358-G p.N252K, while **Panel B** reports associations with cardio-metabolic disease outcomes. Associations are presented as beta coefficient in standardized units of continuous trait or odds ratio for disease outcome per minor allele G. The minor allele is listed following the rsid above the corresponding plot. Abbreviations: WHR, waist to hip ratio *unadjusted* for body mass index; Waist, waist circumference; Hip, hip circumference; BMI, body mass index; BF %, body fat percentage; SBP, systolic blood pressure; DBP, diastolic blood pressure; LDL-C, low-density lipoprotein cholesterol; HDL-C, high-density lipoprotein cholesterol; SD, standard deviation; OR, odds ratio. **Panel C** shows the specific enzymatic activity of PNPLA2-N252K and wild-type protein in *in vitro* expression studies. The graph reports the results of three technical experimental replicates. Full blue circles (individual replicate result) and horizontal bars (averages) are for wild type PNPLA2 while full dark red circles (individual replicate result) and horizontal bars (averages) are for p.N252K mutant PNPLA2. Abbreviations: FA, fatty acids; ABHD5, Abhydrolase Domain Containing 5 also known as Comparative Gene Identification-58 (CGI-58); G0G2, G0/G1 Switch 2. **Panel D** represents the location of the rs140201358 p.N252K variant at the exon 6 – intron 6 splice junction of *PNPLA2*. At the top of the panel is a representation of conservation of residues across mammalian species, with the proportion of observed nucleotides at each position represented by the size of the font. **Panel E** shows the results of allele-specific expression of *PNPLA2* in subcutaneous adipose tissue from four unrelated heterozygous carriers of rs140201358 p.N252K. The individual results are shown on the left, while the pooled results on the right. The reported p-values are two-tailed binomial probabilities. **Panel F** shows the association of rs140201358 N252K genotype with *PNPLA2* gene expression measured by quantitative transcription polymerase chain reaction in peripheral blood mononuclear cells from 106 homozygous carriers of the wild-type C allele (i.e. 252N) and 26 heterozygous carriers of the alternative G allele (i.e. 252K). The mRNA levels of *PNPLA2* were standardized on the basis of the distribution in homozygous wild-type participants. Boxes represent the median and interquartile range, whiskers represent the upper and lower adjacent values, circles represent outliers for each genotype group. Association between genotype and *PNPLA2* expression was estimated by linear regression.



**Figures**

**Figure 1**

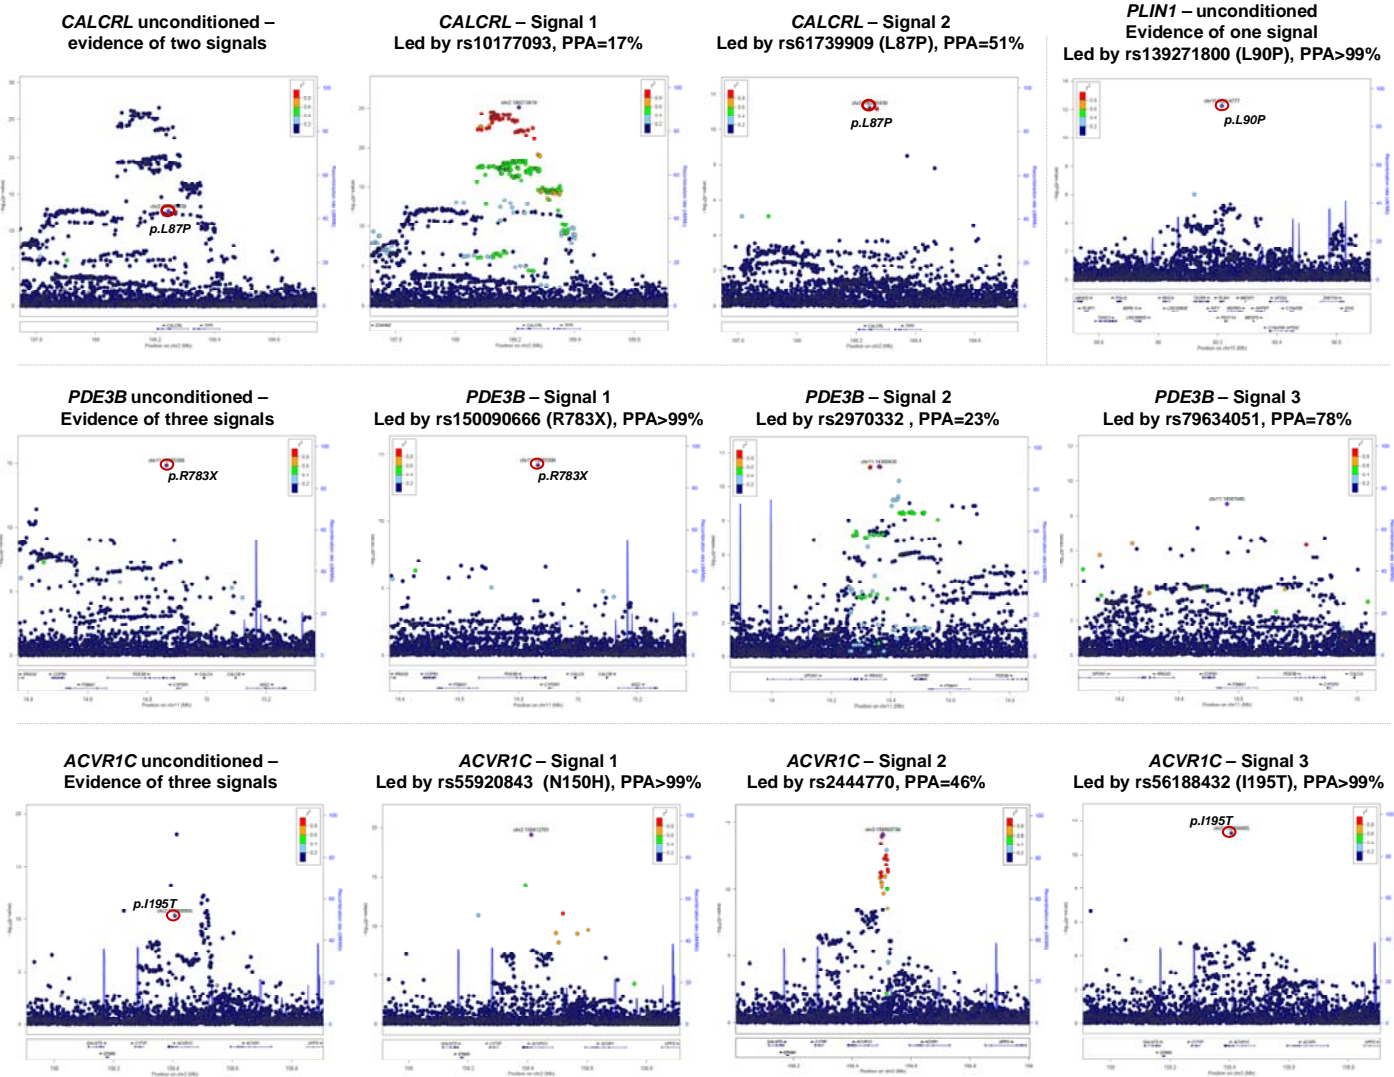

Figure 2

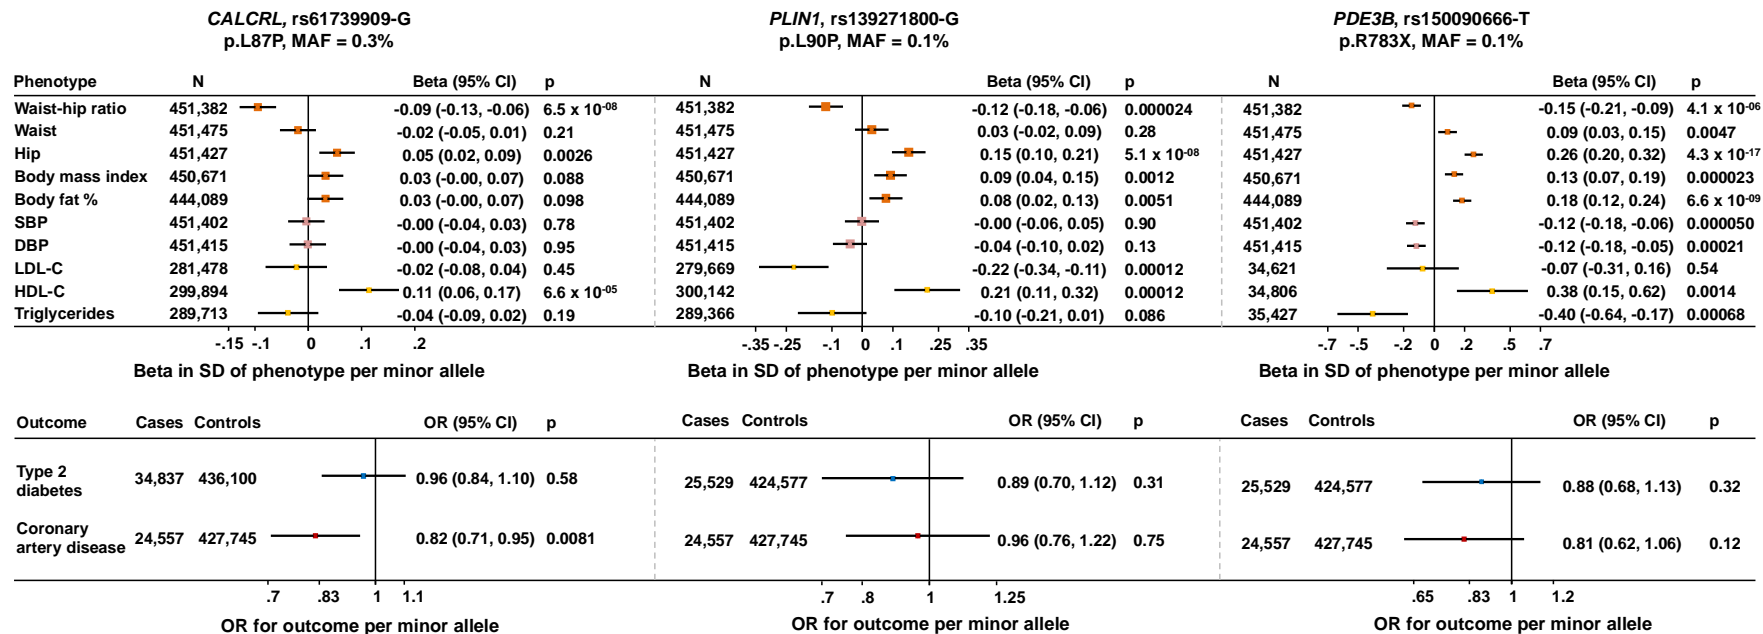

Figure 3

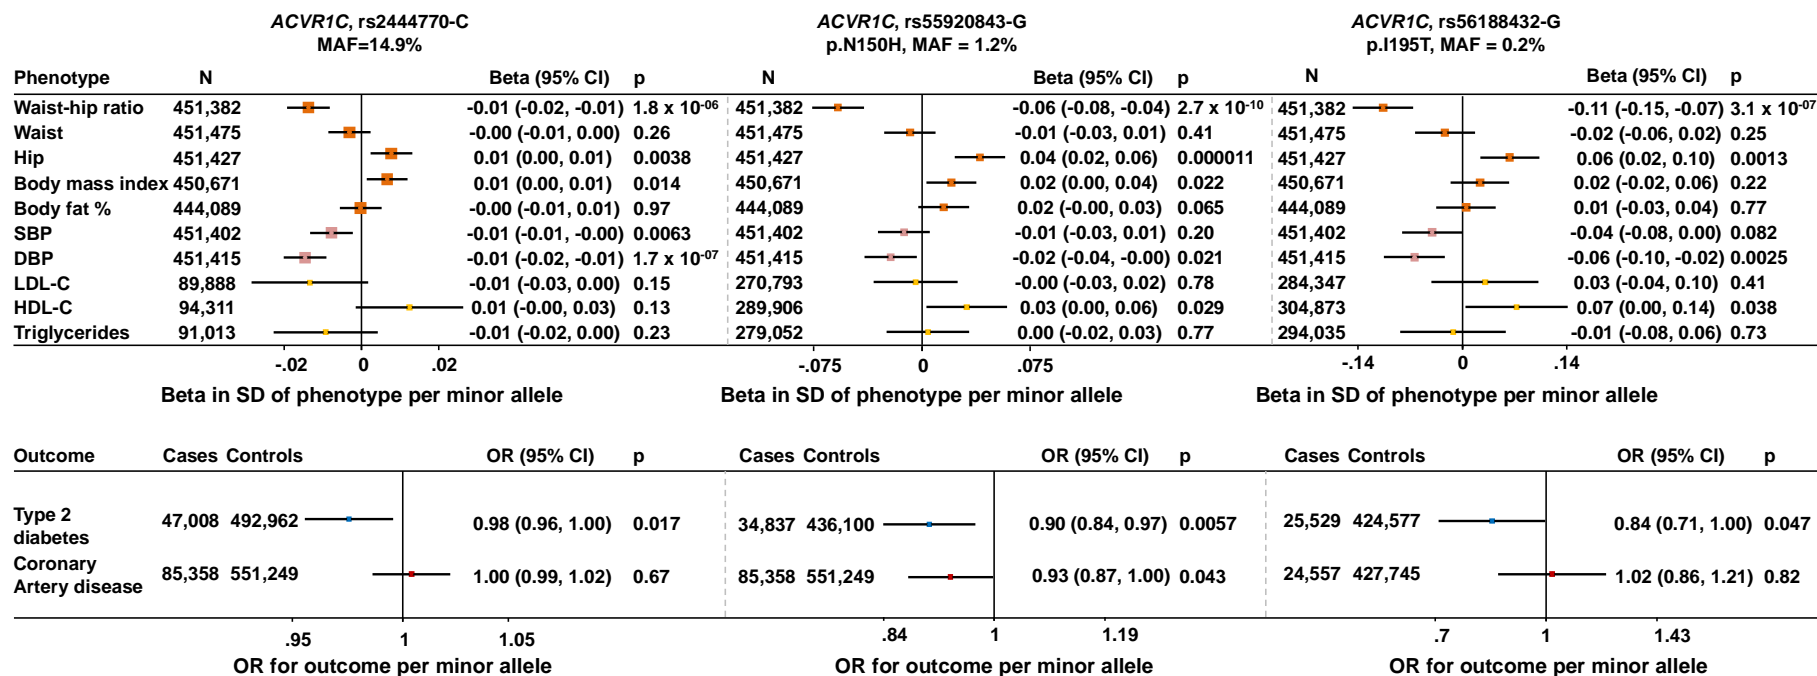

Figure 4

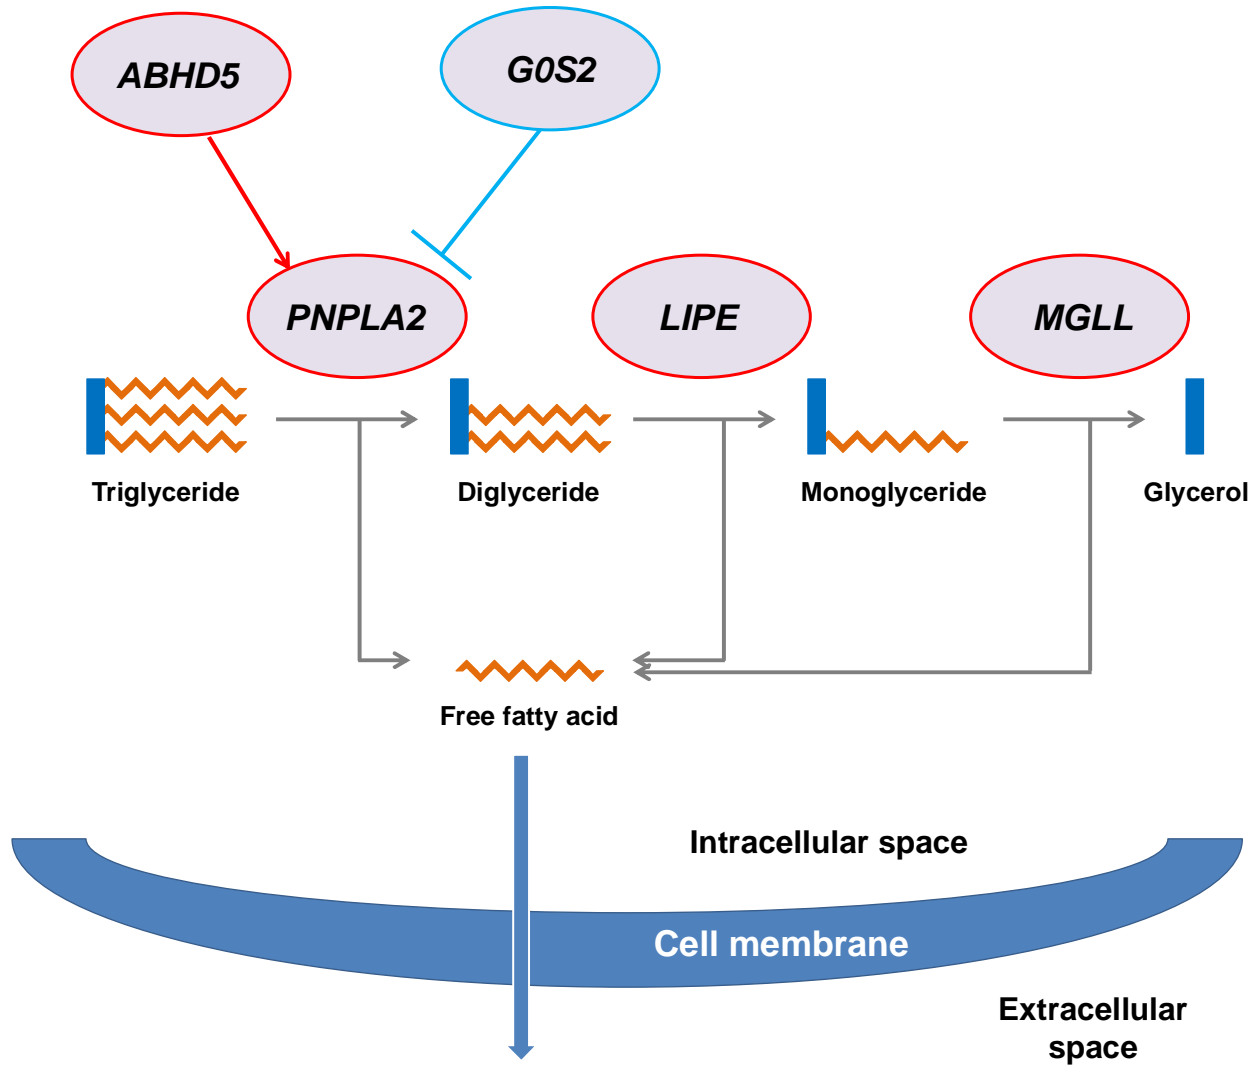

**Figure 5**

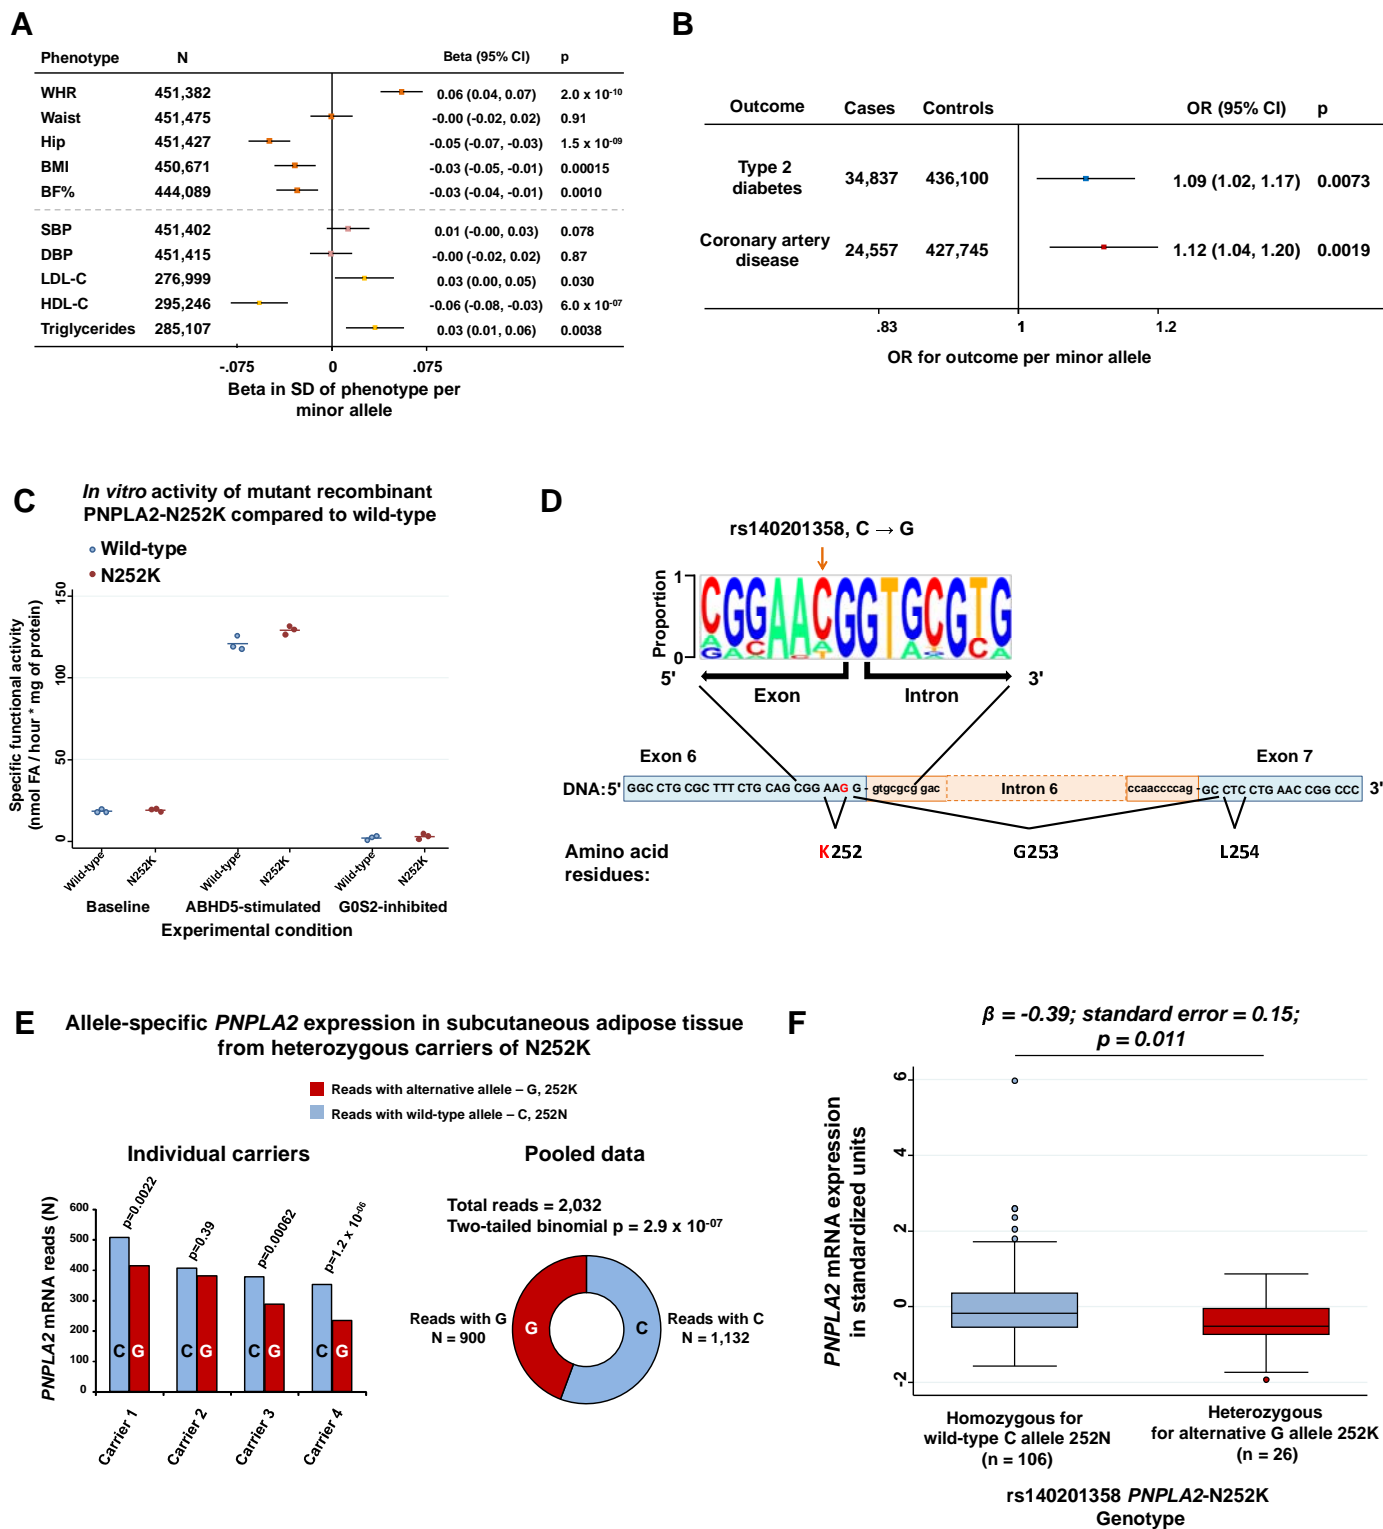

## References

1. Dale CE, *et al.* (2017) Causal Associations of Adiposity and Body Fat Distribution With Coronary Heart Disease, Stroke Subtypes, and Type 2 Diabetes Mellitus: A Mendelian Randomization Analysis. *Circulation* 135(24):2373-2388.
2. Emerging Risk Factors C, *et al.* (2011) Separate and combined associations of body-mass index and abdominal adiposity with cardiovascular disease: collaborative analysis of 58 prospective studies. *Lancet* 377(9771):1085-1095.
3. Yusuf S, *et al.* (2005) Obesity and the risk of myocardial infarction in 27,000 participants from 52 countries: a case-control study. *Lancet* 366(9497):1640-1649.
4. Pischon T, *et al.* (2008) General and abdominal adiposity and risk of death in Europe. *The New England journal of medicine* 359(20):2105-2120.
5. Emdin CA, *et al.* (2017) Genetic Association of Waist-to-Hip Ratio With Cardiometabolic Traits, Type 2 Diabetes, and Coronary Heart Disease. *JAMA : the journal of the American Medical Association* 317(6):626-634.
6. Shungin D, *et al.* (2015) New genetic loci link adipose and insulin biology to body fat distribution. *Nature* 518(7538):187-196.
7. Lotta LA, *et al.* (2017) Integrative genomic analysis implicates limited peripheral adipose storage capacity in the pathogenesis of human insulin resistance. *Nature genetics* 49(1):17-26.
8. Chu AY, *et al.* (2017) Multiethnic genome-wide meta-analysis of ectopic fat depots identifies loci associated with adipocyte development and differentiation. *Nature genetics* 49(1):125-130.
9. Cohen JC, Boerwinkle E, Mosley TH, Jr., & Hobbs HH (2006) Sequence variations in PCSK9, low LDL, and protection against coronary heart disease. *The New England journal of medicine* 354(12):1264-1272.
10. Kathiresan S & Myocardial Infarction Genetics C (2008) A PCSK9 missense variant associated with a reduced risk of early-onset myocardial infarction. *The New England journal of medicine* 358(21):2299-2300.
11. Clarke R, *et al.* (2009) Genetic variants associated with Lp(a) lipoprotein level and coronary disease. *The New England journal of medicine* 361(26):2518-2528.
12. Tg, *et al.* (2014) Loss-of-function mutations in APOC3, triglycerides, and coronary disease. *The New England journal of medicine* 371(1):22-31.
13. Jorgensen AB, Frikke-Schmidt R, Nordestgaard BG, & Tybjaerg-Hansen A (2014) Loss-of-function mutations in APOC3 and risk of ischemic vascular disease. *The New England journal of medicine* 371(1):32-41.
14. Musunuru K, *et al.* (2010) Exome sequencing, ANGPTL3 mutations, and familial combined hypolipidemia. *The New England journal of medicine* 363(23):2220-2227.
15. Dewey FE, *et al.* (2017) Genetic and Pharmacologic Inactivation of ANGPTL3 and Cardiovascular Disease. *The New England journal of medicine* 377(3):211-221.
16. Stitzel NO, *et al.* (2017) ANGPTL3 Deficiency and Protection Against Coronary Artery Disease. *Journal of the American College of Cardiology* 69(16):2054-2063.
17. Stein EA, *et al.* (2012) Effect of a monoclonal antibody to PCSK9 on LDL cholesterol. *The New England journal of medicine* 366(12):1108-1118.
18. Gaudet D, *et al.* (2014) Targeting APOC3 in the familial chylomicronemia syndrome. *The New England journal of medicine* 371(23):2200-2206.
19. Gaudet D, *et al.* (2015) Antisense Inhibition of Apolipoprotein C-III in Patients with Hypertriglyceridemia. *The New England journal of medicine* 373(5):438-447.
20. Graham MJ, *et al.* (2017) Cardiovascular and Metabolic Effects of ANGPTL3 Antisense Oligonucleotides. *The New England journal of medicine* 377(3):222-232.
21. Gaudet D, *et al.* (2017) ANGPTL3 Inhibition in Homozygous Familial Hypercholesterolemia. *The New England journal of medicine* 377(3):296-297.

22. Viney NJ, *et al.* (2016) Antisense oligonucleotides targeting apolipoprotein(a) in people with raised lipoprotein(a): two randomised, double-blind, placebo-controlled, dose-ranging trials. *Lancet* 388(10057):2239-2253.
23. Genomes Project C, *et al.* (2012) An integrated map of genetic variation from 1,092 human genomes. *Nature* 491(7422):56-65.
24. McCarthy S, *et al.* (2016) A reference panel of 64,976 haplotypes for genotype imputation. *Nature genetics* 48(10):1279-1283.
25. Raychaudhuri S (2011) Mapping rare and common causal alleles for complex human diseases. *Cell* 147(1):57-69.
26. Emdin CA, *et al.* (2018) Analysis of predicted loss-of-function variants in UK Biobank identifies variants protective for disease. *Nature communications* 9(1):1613.
27. Dackor RT, *et al.* (2006) Hydrops fetalis, cardiovascular defects, and embryonic lethality in mice lacking the calcitonin receptor-like receptor gene. *Molecular and cellular biology* 26(7):2511-2518.
28. Gandotra S, *et al.* (2011) Perilipin deficiency and autosomal dominant partial lipodystrophy. *The New England journal of medicine* 364(8):740-748.
29. DiPilato LM, *et al.* (2015) The Role of PDE3B Phosphorylation in the Inhibition of Lipolysis by Insulin. *Molecular and cellular biology* 35(16):2752-2760.
30. Yogosawa S, Mizutani S, Ogawa Y, & Izumi T (2013) Activin receptor-like kinase 7 suppresses lipolysis to accumulate fat in obesity through downregulation of peroxisome proliferator-activated receptor gamma and C/EBPalpha. *Diabetes* 62(1):115-123.
31. Consortium GT (2015) Human genomics. The Genotype-Tissue Expression (GTEx) pilot analysis: multitissue gene regulation in humans. *Science* 348(6235):648-660.
32. Granneman JG, Moore HP, Krishnamoorthy R, & Rathod M (2009) Perilipin controls lipolysis by regulating the interactions of AB-hydrolase containing 5 (Abhd5) and adipose triglyceride lipase (Atgl). *The Journal of biological chemistry* 284(50):34538-34544.
33. Gandotra S, *et al.* (2011) Human frame shift mutations affecting the carboxyl terminus of perilipin increase lipolysis by failing to sequester the adipose triglyceride lipase (ATGL) coactivator AB-hydrolase-containing 5 (ABHD5). *The Journal of biological chemistry* 286(40):34998-35006.
34. Degerman E, *et al.* (2011) From PDE3B to the regulation of energy homeostasis. *Current opinion in pharmacology* 11(6):676-682.
35. Dong Y, Betancourt A, Belfort M, & Yallampalli C (2017) Targeting Adrenomedullin to Improve Lipid Homeostasis in Diabetic Pregnancies. *The Journal of clinical endocrinology and metabolism* 102(9):3425-3436.
36. Semple RK, Savage DB, Cochran EK, Gorden P, & O'Rahilly S (2011) Genetic syndromes of severe insulin resistance. *Endocrine reviews* 32(4):498-514.
37. Zimmermann R, *et al.* (2004) Fat mobilization in adipose tissue is promoted by adipose triglyceride lipase. *Science* 306(5700):1383-1386.
38. Sveinbjornsson G, *et al.* (2016) Weighting sequence variants based on their annotation increases power of whole-genome association studies. *Nature genetics* 48(3):314-317.
39. Garg A (2004) Acquired and inherited lipodystrophies. *The New England journal of medicine* 350(12):1220-1234.
40. Ryden M, Andersson DP, Bergstrom IB, & Arner P (2014) Adipose tissue and metabolic alterations: regional differences in fat cell size and number matter, but differently: a cross-sectional study. *The Journal of clinical endocrinology and metabolism* 99(10):E1870-1876.
41. Karpe F & Pinnick KE (2015) Biology of upper-body and lower-body adipose tissue--link to whole-body phenotypes. *Nature reviews. Endocrinology* 11(2):90-100.
42. Gavrilova O, *et al.* (2000) Surgical implantation of adipose tissue reverses diabetes in lipotrophic mice. *The Journal of clinical investigation* 105(3):271-278.
43. Scott RA, *et al.* (2014) Common genetic variants highlight the role of insulin resistance and body fat distribution in type 2 diabetes, independent of obesity. *Diabetes* 63(12):4378-4387.

44. Yaghoobkar H, *et al.* (2014) Genetic evidence for a normal-weight "metabolically obese" phenotype linking insulin resistance, hypertension, coronary artery disease, and type 2 diabetes. *Diabetes* 63(12):4369-4377.
45. Yaghoobkar H, *et al.* (2016) Genetic evidence for a link between favorable adiposity and lower risk of type 2 diabetes, hypertension and heart disease. *Diabetes*.
46. Zechner R, Madeo F, & Kratky D (2017) Cytosolic lipolysis and lipophagy: two sides of the same coin. *Nature reviews. Molecular cell biology* 18(11):671-684.
47. Arner P, *et al.* (2011) Dynamics of human adipose lipid turnover in health and metabolic disease. *Nature* 478(7367):110-113.
48. Jonker JW, *et al.* (2012) A PPARgamma-FGF1 axis is required for adaptive adipose remodelling and metabolic homeostasis. *Nature* 485(7398):391-394.
49. Fischer J, *et al.* (2007) The gene encoding adipose triglyceride lipase (PNPLA2) is mutated in neutral lipid storage disease with myopathy. *Nature genetics* 39(1):28-30.
50. Pennisi EM, *et al.* (2017) Neutral Lipid Storage Diseases: clinical/genetic features and natural history in a large cohort of Italian patients. *Orphanet journal of rare diseases* 12(1):90.
51. Reilich P, *et al.* (2011) The phenotypic spectrum of neutral lipid storage myopathy due to mutations in the PNPLA2 gene. *Journal of neurology* 258(11):1987-1997.
52. Kaneko K, *et al.* (2014) A novel mutation in PNPLA2 causes neutral lipid storage disease with myopathy and triglyceride deposit cardiomyovasculopathy: a case report and literature review. *Neuromuscular disorders : NMD* 24(7):634-641.
53. Albert JS, *et al.* (2014) Null mutation in hormone-sensitive lipase gene and risk of type 2 diabetes. *The New England journal of medicine* 370(24):2307-2315.
54. Schweiger M, *et al.* (2017) Pharmacological inhibition of adipose triglyceride lipase corrects high-fat diet-induced insulin resistance and hepatosteatosis in mice. *Nature communications* 8:14859.
55. Mayer N, *et al.* (2013) Development of small-molecule inhibitors targeting adipose triglyceride lipase. *Nature chemical biology* 9(12):785-787.
56. Cerk IK, *et al.* (2014) A peptide derived from G0/G1 switch gene 2 acts as noncompetitive inhibitor of adipose triglyceride lipase. *The Journal of biological chemistry* 289(47):32559-32570.
57. Cain C (2014) ALK7's obese functions. *SciBX* 7.
58. Bedenis R, *et al.* (2014) Cilostazol for intermittent claudication. *The Cochrane database of systematic reviews* (10):CD003748.
59. Tan L, *et al.* (2015) Efficacy and Safety of Cilostazol Therapy in Ischemic Stroke: A Meta-analysis. *Journal of stroke and cerebrovascular diseases : the official journal of National Stroke Association* 24(5):930-938.
60. Rondini EA, *et al.* (2017) Novel Pharmacological Probes Reveal ABHD5 as a Locus of Lipolysis Control in White and Brown Adipocytes. *The Journal of pharmacology and experimental therapeutics* 363(3):367-376.
61. Suh JM, *et al.* (2014) Endocrinization of FGF1 produces a neomorphic and potent insulin sensitizer. *Nature* 513(7518):436-439.
62. Gasser E, Moutos CP, Downes M, & Evans RM (2017) FGF1 - a new weapon to control type 2 diabetes mellitus. *Nature reviews. Endocrinology* 13(10):599-609.
63. Sudlow C, *et al.* (2015) UK biobank: an open access resource for identifying the causes of a wide range of complex diseases of middle and old age. *PLoS medicine* 12(3):e1001779.
64. Mahajan A, *et al.* (2017) Refining The Accuracy Of Validated Target Identification Through Coding Variant Fine-Mapping In Type 2 Diabetes. *bioRxiv*.
65. Eastwood SV, *et al.* (2016) Algorithms for the Capture and Adjudication of Prevalent and Incident Diabetes in UK Biobank. *PloS one* 11(9):e0162388.
66. Klarin D, *et al.* (2017) Genetic analysis in UK Biobank links insulin resistance and transendothelial migration pathways to coronary artery disease. *Nature genetics*.



67. Nelson CP, *et al.* (2017) Association analyses based on false discovery rate implicate new loci for coronary artery disease. *Nature genetics*.
68. InterAct C, *et al.* (2011) Design and cohort description of the InterAct Project: an examination of the interaction of genetic and lifestyle factors on the incidence of type 2 diabetes in the EPIC Study. *Diabetologia* 54(9):2272-2282.
69. Morris AP, *et al.* (2012) Large-scale association analysis provides insights into the genetic architecture and pathophysiology of type 2 diabetes. *Nature genetics* 44(9):981-990.
70. Nikpay M, *et al.* (2015) A comprehensive 1,000 Genomes-based genome-wide association meta-analysis of coronary artery disease. *Nature genetics* 47(10):1121-1130.
71. Global Lipids Genetics C, *et al.* (2013) Discovery and refinement of loci associated with lipid levels. *Nature genetics* 45(11):1274-1283.
72. Liu DJ, *et al.* (2017) Exome-wide association study of plasma lipids in >300,000 individuals. *Nature genetics*.
73. Lotta LA, *et al.* (2016) Genetic Predisposition to an Impaired Metabolism of the Branched-Chain Amino Acids and Risk of Type 2 Diabetes: A Mendelian Randomisation Analysis. *PLoS medicine* 13(11):e1002179.
74. Day N, *et al.* (1999) EPIC-Norfolk: study design and characteristics of the cohort. European Prospective Investigation of Cancer. *British journal of cancer* 80 Suppl 1:95-103.
75. Aschard H, Vilhjalmsdottir BJ, Joshi AD, Price AL, & Kraft P (2015) Adjusting for heritable covariates can bias effect estimates in genome-wide association studies. *American journal of human genetics* 96(2):329-339.
76. Bycroft C, *et al.* (2017) Genome-wide genetic data on ~500,000 UK Biobank participants. *bioRxiv*.
77. Wang K, Li M, & Hakonarson H (2010) ANNOVAR: functional annotation of genetic variants from high-throughput sequencing data. *Nucleic acids research* 38(16):e164.
78. Loh PR, *et al.* (2015) Efficient Bayesian mixed-model analysis increases association power in large cohorts. *Nature genetics* 47(3):284-290.
79. Yang J, Lee SH, Goddard ME, & Visscher PM (2011) GCTA: a tool for genome-wide complex trait analysis. *American journal of human genetics* 88(1):76-82.
80. Wellcome Trust Case Control C, *et al.* (2012) Bayesian refinement of association signals for 14 loci in 3 common diseases. *Nature genetics* 44(12):1294-1301.
81. Webb B & Sali A (2016) Comparative Protein Structure Modeling Using MODELLER. *Current protocols in protein science* 86:2 9 1-2 9 37.
82. Alva V, Nam SZ, Soding J, & Lupas AN (2016) The MPI bioinformatics Toolkit as an integrative platform for advanced protein sequence and structure analysis. *Nucleic acids research* 44(W1):W410-415.
83. Altenhoff AM, *et al.* (2015) The OMA orthology database in 2015: function predictions, better plant support, synteny view and other improvements. *Nucleic acids research* 43(Database issue):D240-249.
84. Waterhouse AM, Procter JB, Martin DM, Clamp M, & Barton GJ (2009) Jalview Version 2--a multiple sequence alignment editor and analysis workbench. *Bioinformatics* 25(9):1189-1191.
85. Herwig R, Hardt C, Lienhard M, & Kamburov A (2016) Analyzing and interpreting genome data at the network level with ConsensusPathDB. *Nature protocols* 11(10):1889-1907.
86. Coassin S, *et al.* (2010) Investigation and functional characterization of rare genetic variants in the adipose triglyceride lipase in a large healthy working population. *PLoS genetics* 6(12):e1001239.
87. Schweiger M, *et al.* (2014) Measurement of lipolysis. *Methods in enzymology* 538:171-193.
88. Desmet FO, *et al.* (2009) Human Splicing Finder: an online bioinformatics tool to predict splicing signals. *Nucleic acids research* 37(9):e67.
89. Raponi M, *et al.* (2011) Prediction of single-nucleotide substitutions that result in exon skipping: identification of a splicing silencer in BRCA1 exon 6. *Human mutation* 32(4):436-444.

90. Consortium UK, *et al.* (2015) The UK10K project identifies rare variants in health and disease. *Nature* 526(7571):82-90.
91. Buil A, *et al.* (2015) Gene-gene and gene-environment interactions detected by transcriptome sequence analysis in twins. *Nature genetics* 47(1):88-91.
92. Rozowsky J, *et al.* (2011) AlleleSeq: analysis of allele-specific expression and binding in a network framework. *Molecular systems biology* 7:522.
93. Martin M (2011) Cutadapt removes adapter sequences from high-throughput sequencing reads. *EMBnet.journal* 17(1).
94. Schmieder R & Edwards R (2011) Quality control and preprocessing of metagenomic datasets. *Bioinformatics* 27(6):863-864.
95. Dobin A, *et al.* (2013) STAR: ultrafast universal RNA-seq aligner. *Bioinformatics* 29(1):15-21.
96. Zhao H, *et al.* (2014) CrossMap: a versatile tool for coordinate conversion between genome assemblies. *Bioinformatics* 30(7):1006-1007.
97. McKenna A, *et al.* (2010) The Genome Analysis Toolkit: a MapReduce framework for analyzing next-generation DNA sequencing data. *Genome research* 20(9):1297-1303.
98. Burgess S, Butterworth A, & Thompson SG (2013) Mendelian randomization analysis with multiple genetic variants using summarized data. *Genetic epidemiology* 37(7):658-665.
99. Pruim RJ, *et al.* (2010) LocusZoom: regional visualization of genome-wide association scan results. *Bioinformatics* 26(18):2336-2337.
